# Supplementary material for: The furan route to tropolones: probing the antiproliferative effects of β-thujaplicin analogs
Source: Royal Society of Chemistry journal article supplement (doi:10.1039/c2ob26553b), 2012-01-01

## **The Furan Route to Tropolones: Probing the Antiproliferative Effects of $\beta$ -Thujaplicin Analogs**

E. Zachary Oblak, Erin S. D. Bolstad, Nigel D. Priestley, M. Kyle Hadden and Dennis L. Wright

*Department of Pharmaceutical Sciences*

*University of Connecticut, 69 N. Eagleville Road, Storrs, CT 06269*

**$^1\text{H}$  and  $^{13}\text{C}$  NMR Spectra for Compounds.....** page S2-S35

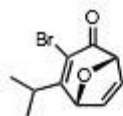

Compound 2a

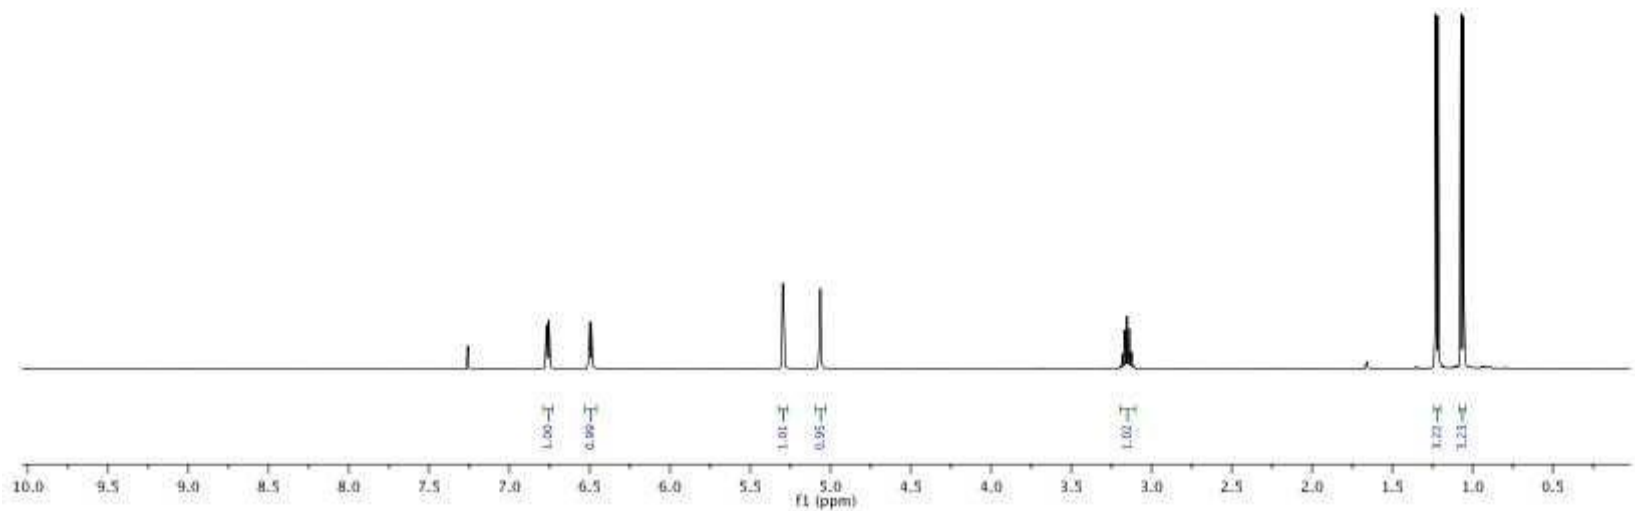

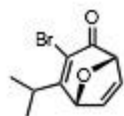

Compound 2a

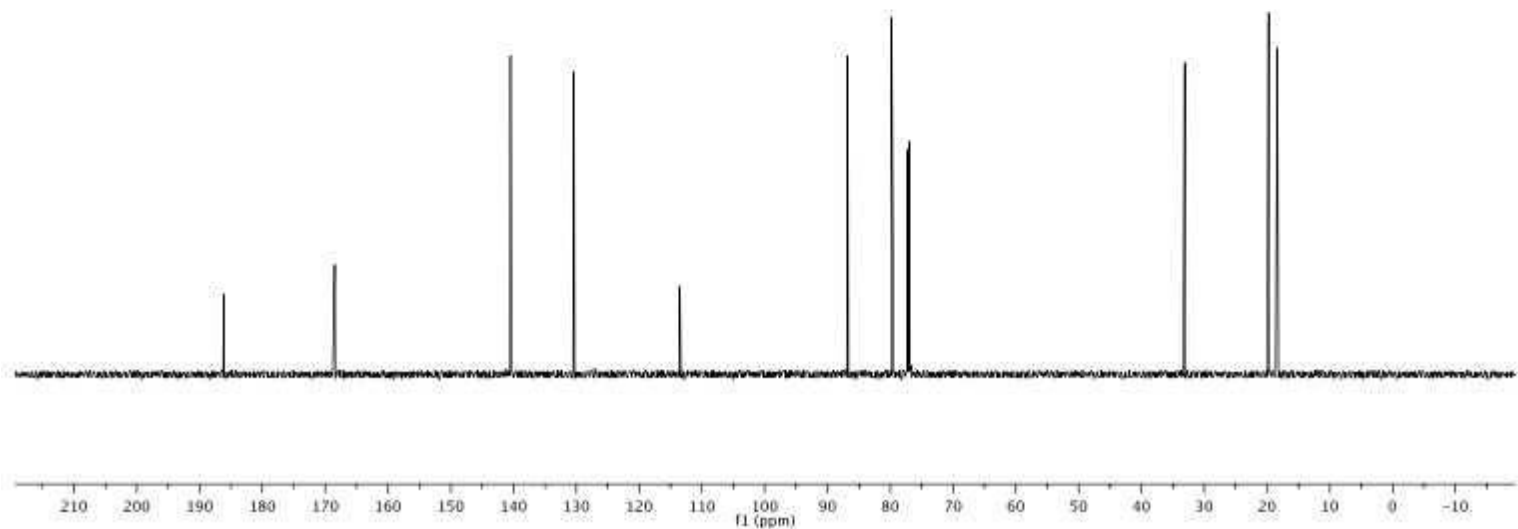

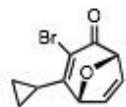

Compound 2b

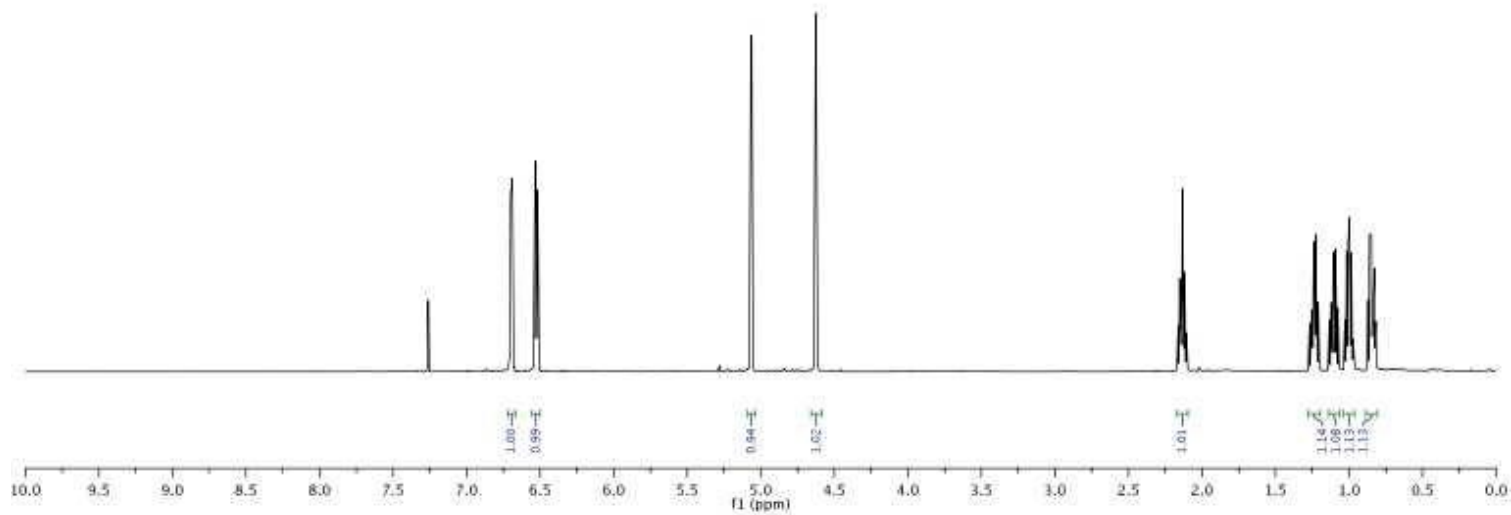

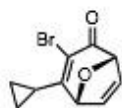

Compound 2b

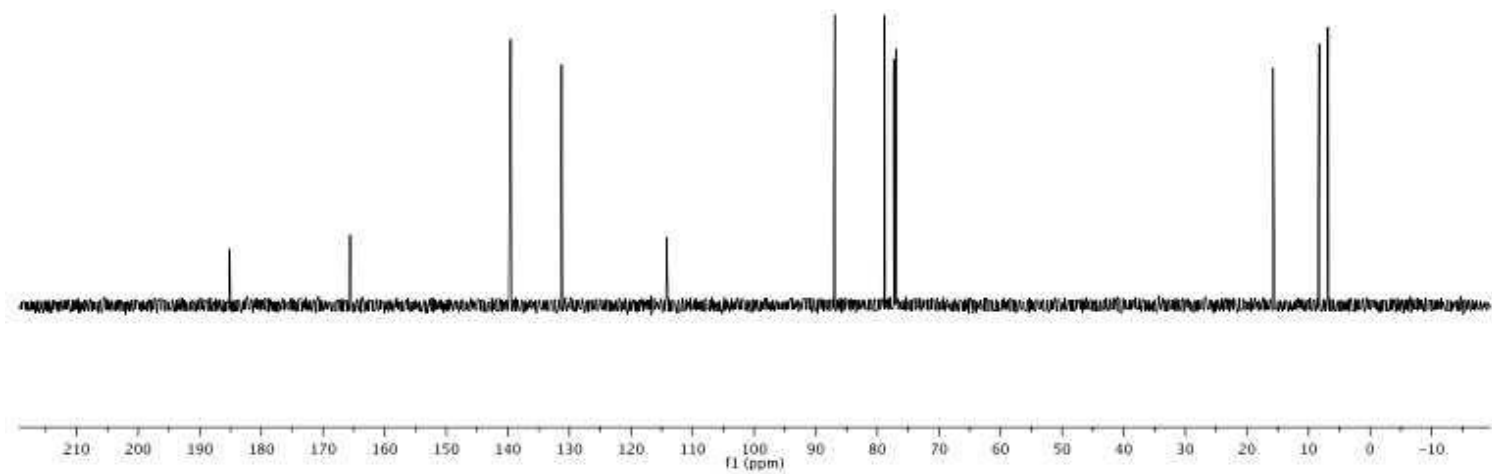

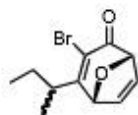

Compound 2c

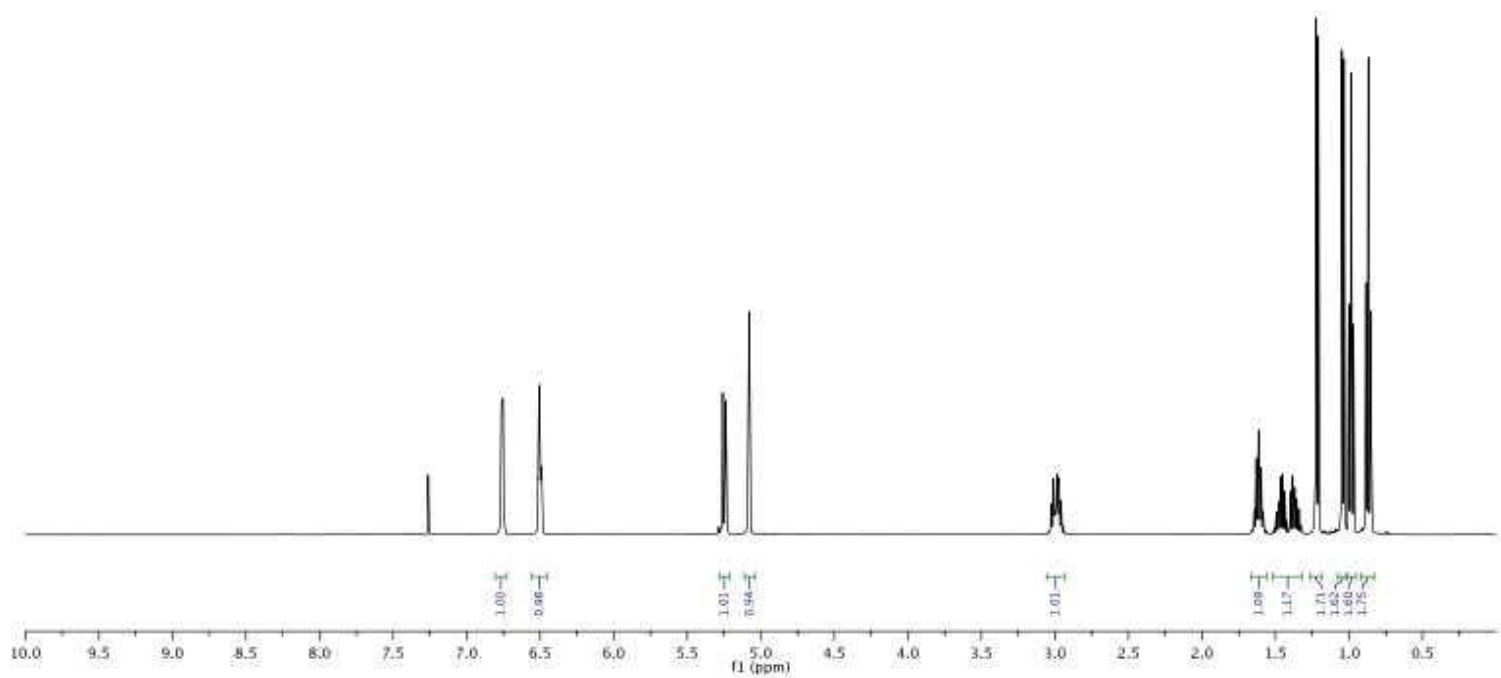

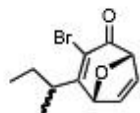

Compound 2c

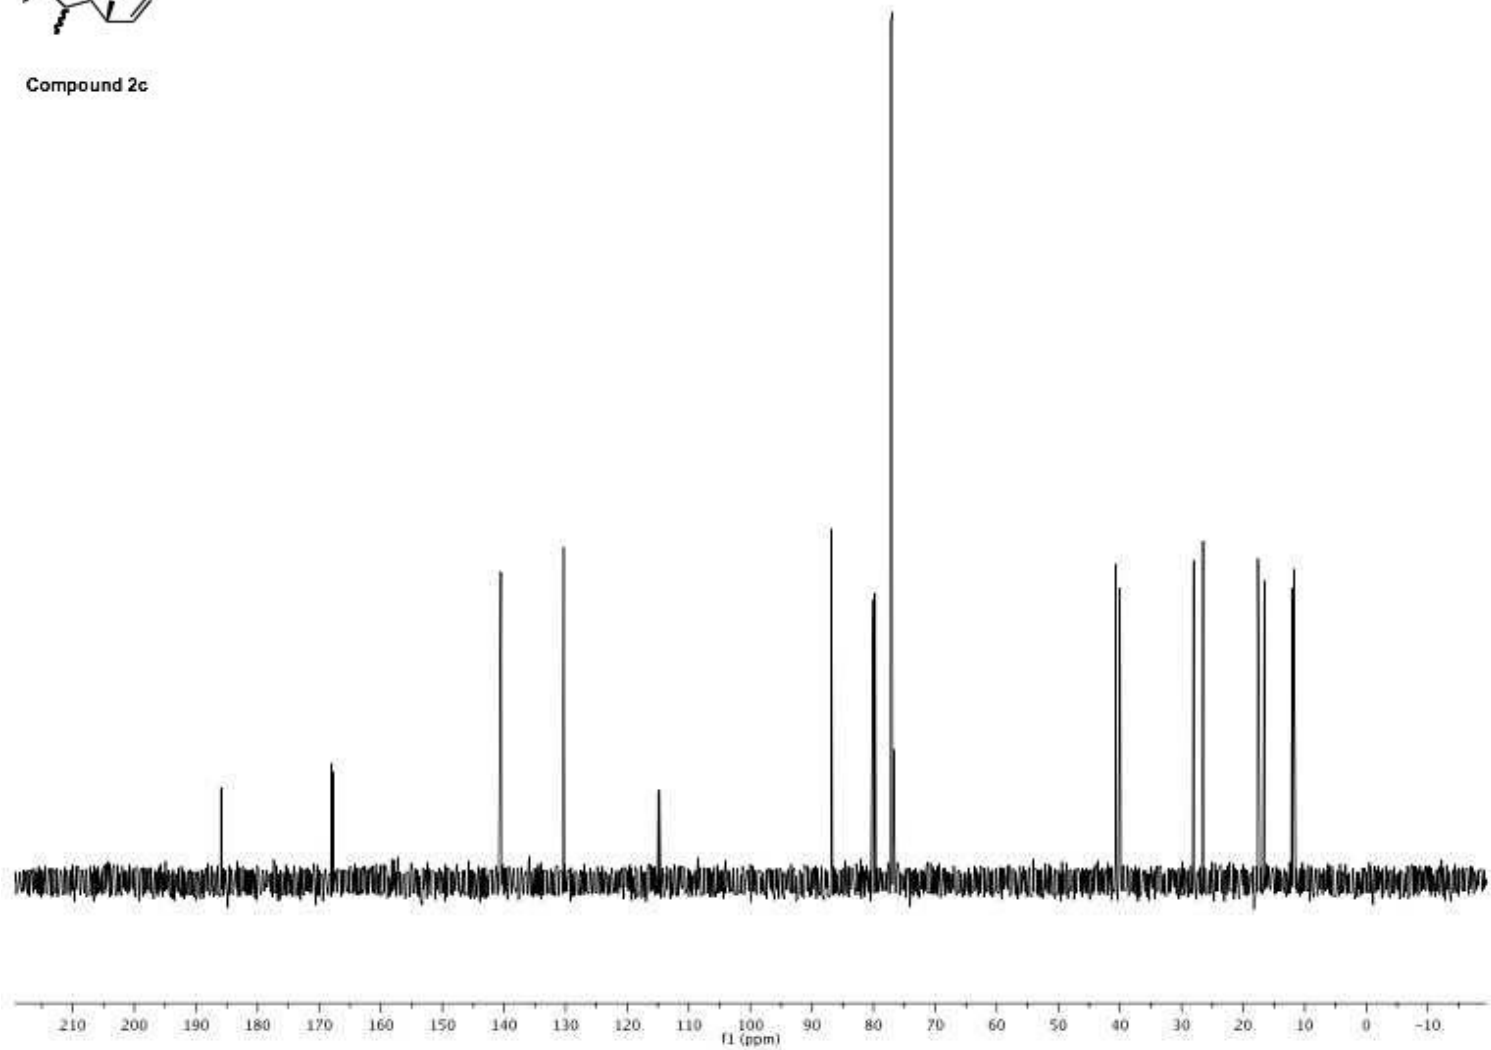

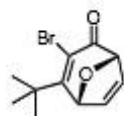

Compound 2d

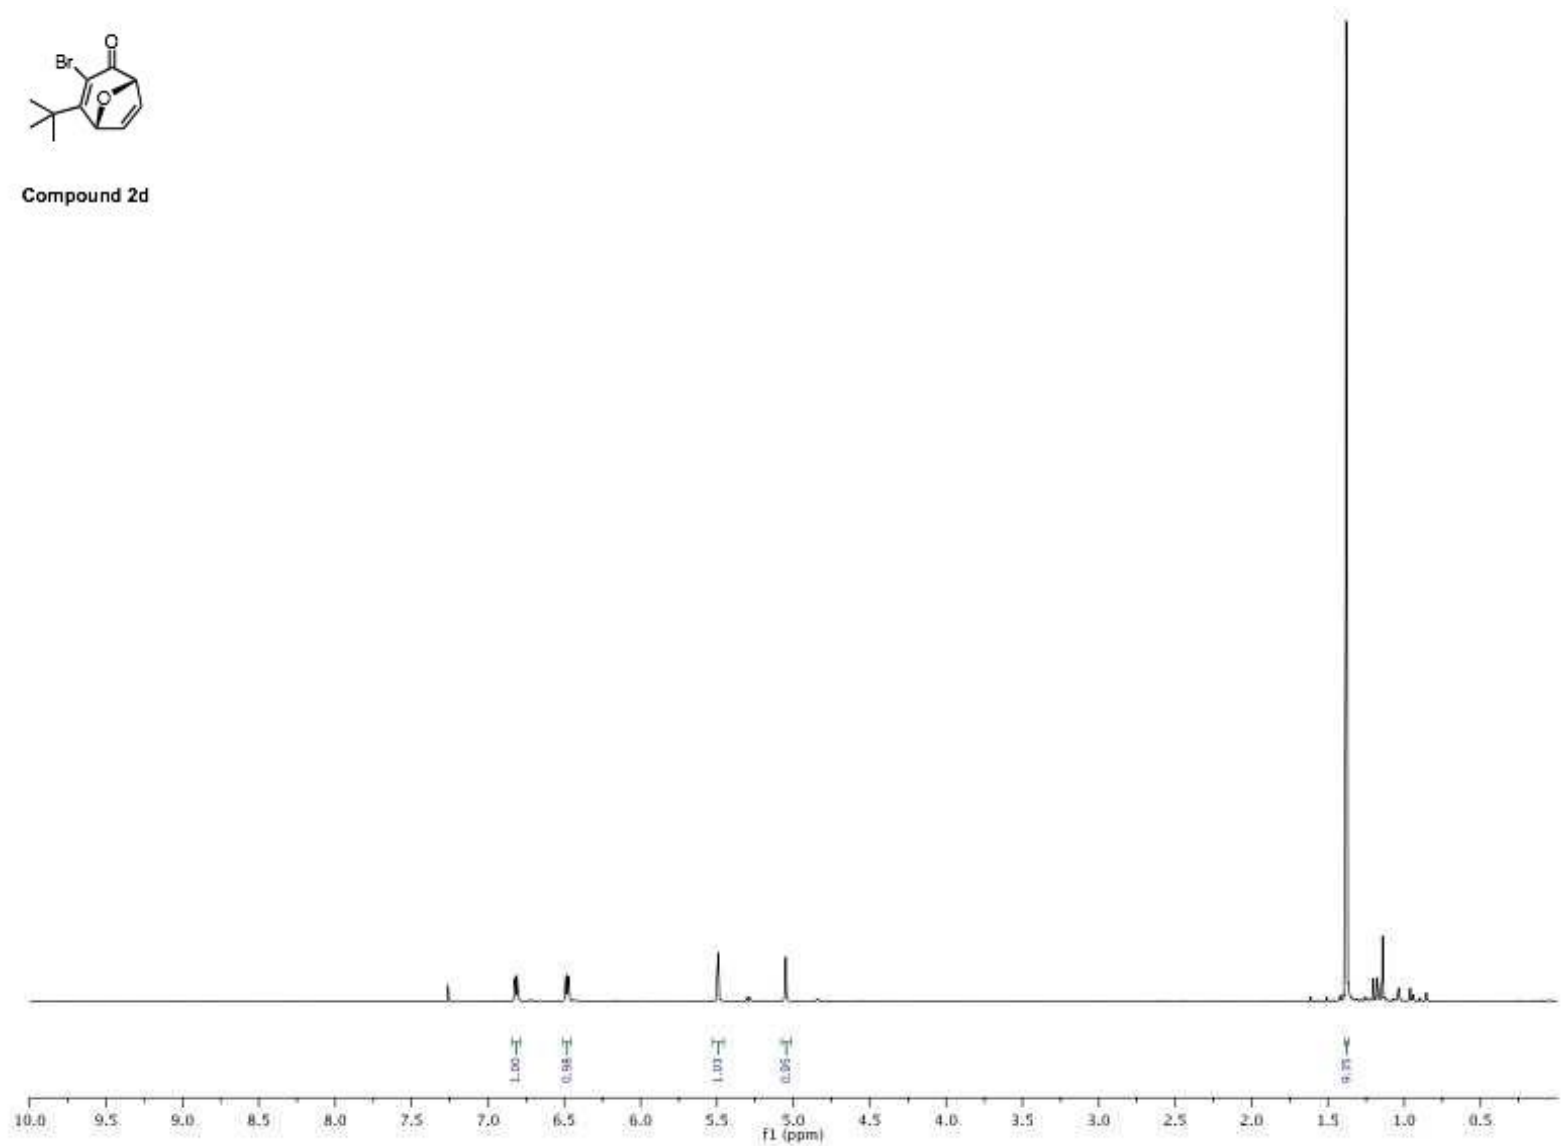



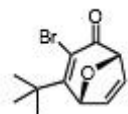

Compound 2d

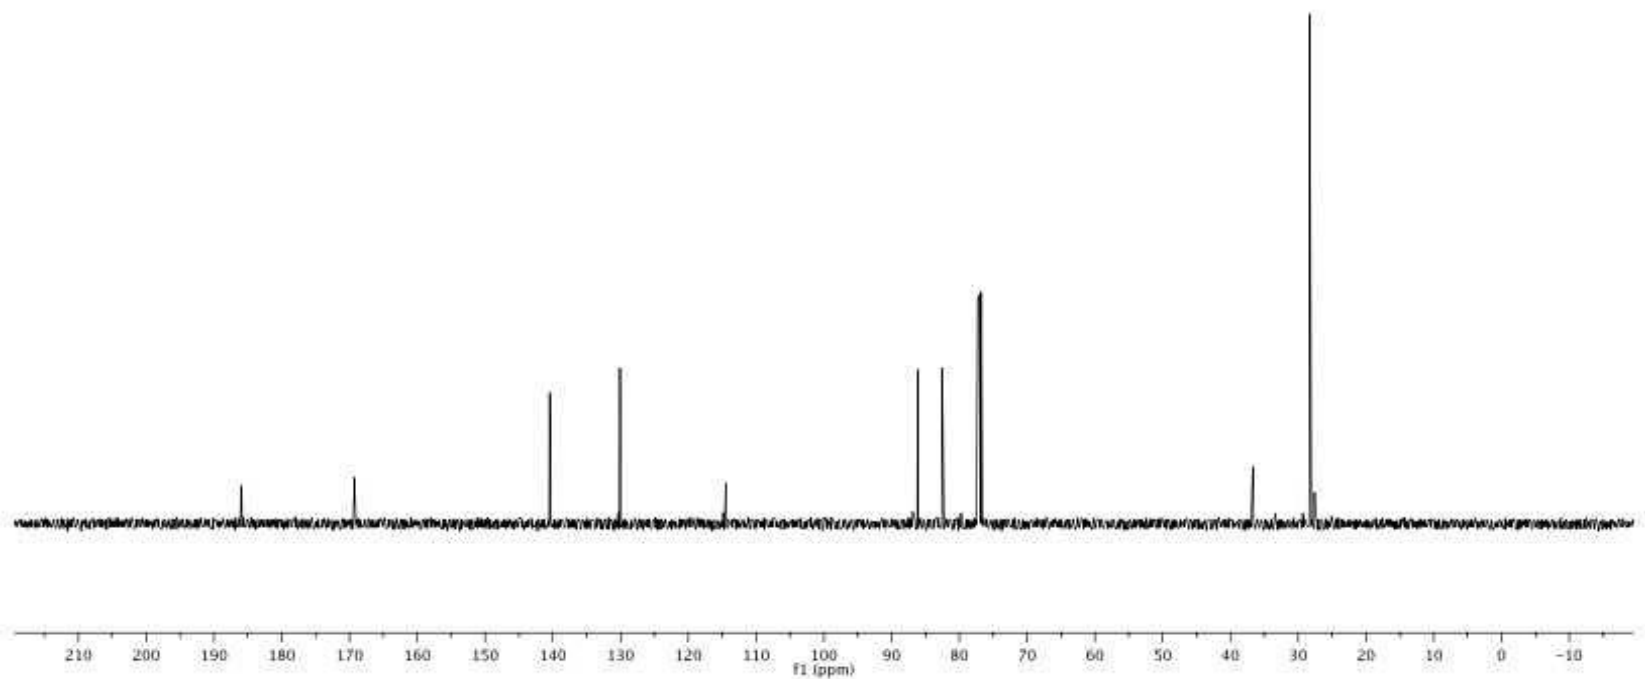

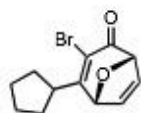

Compound 2e

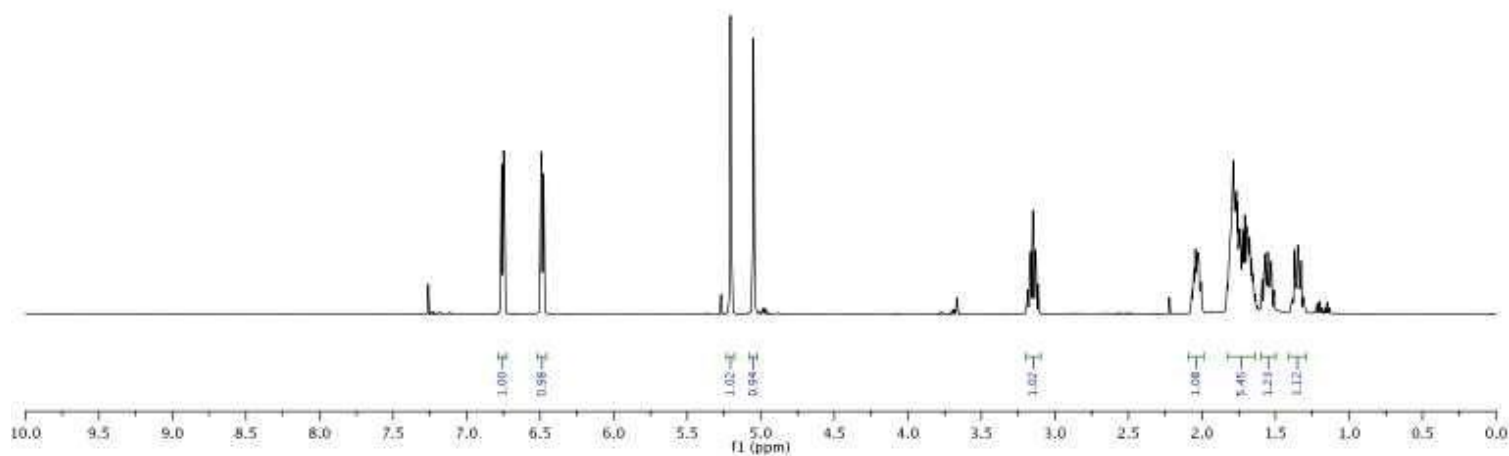

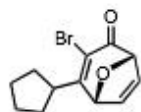

Compound 2e

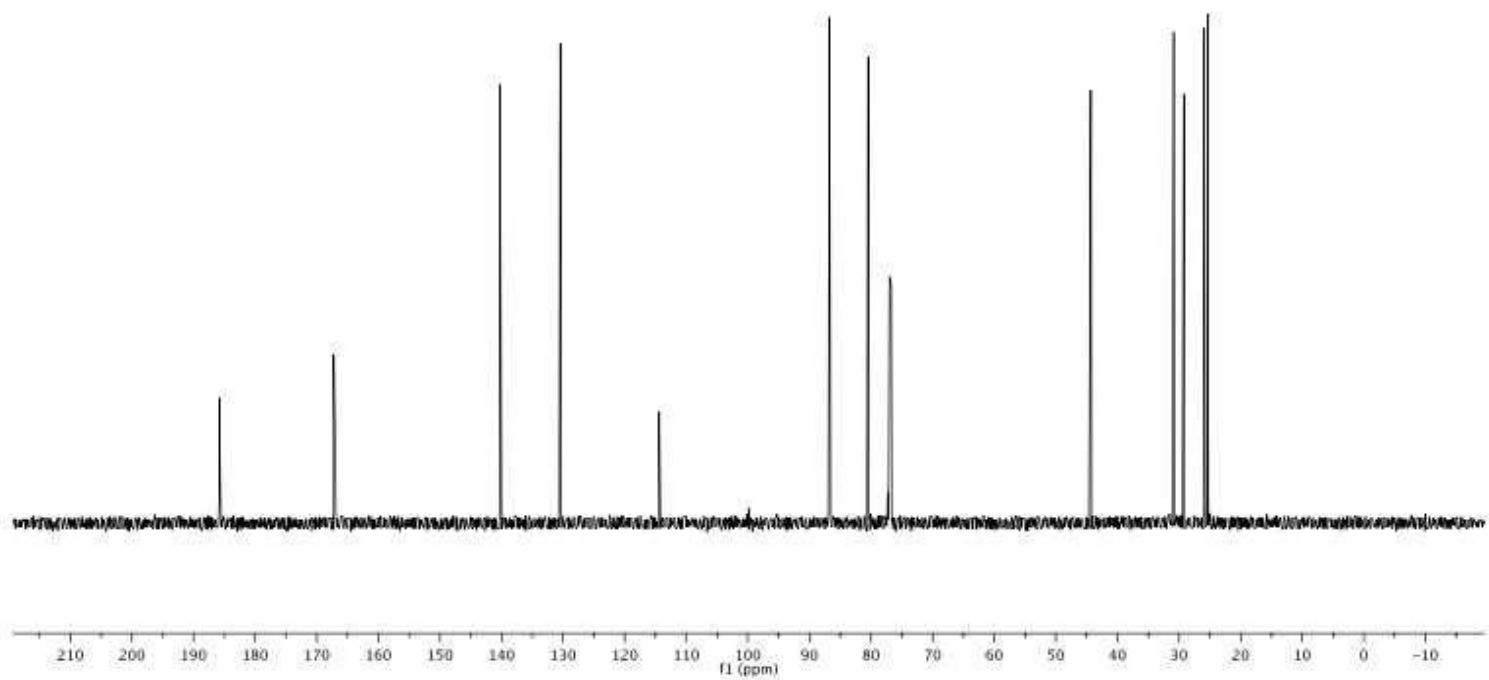

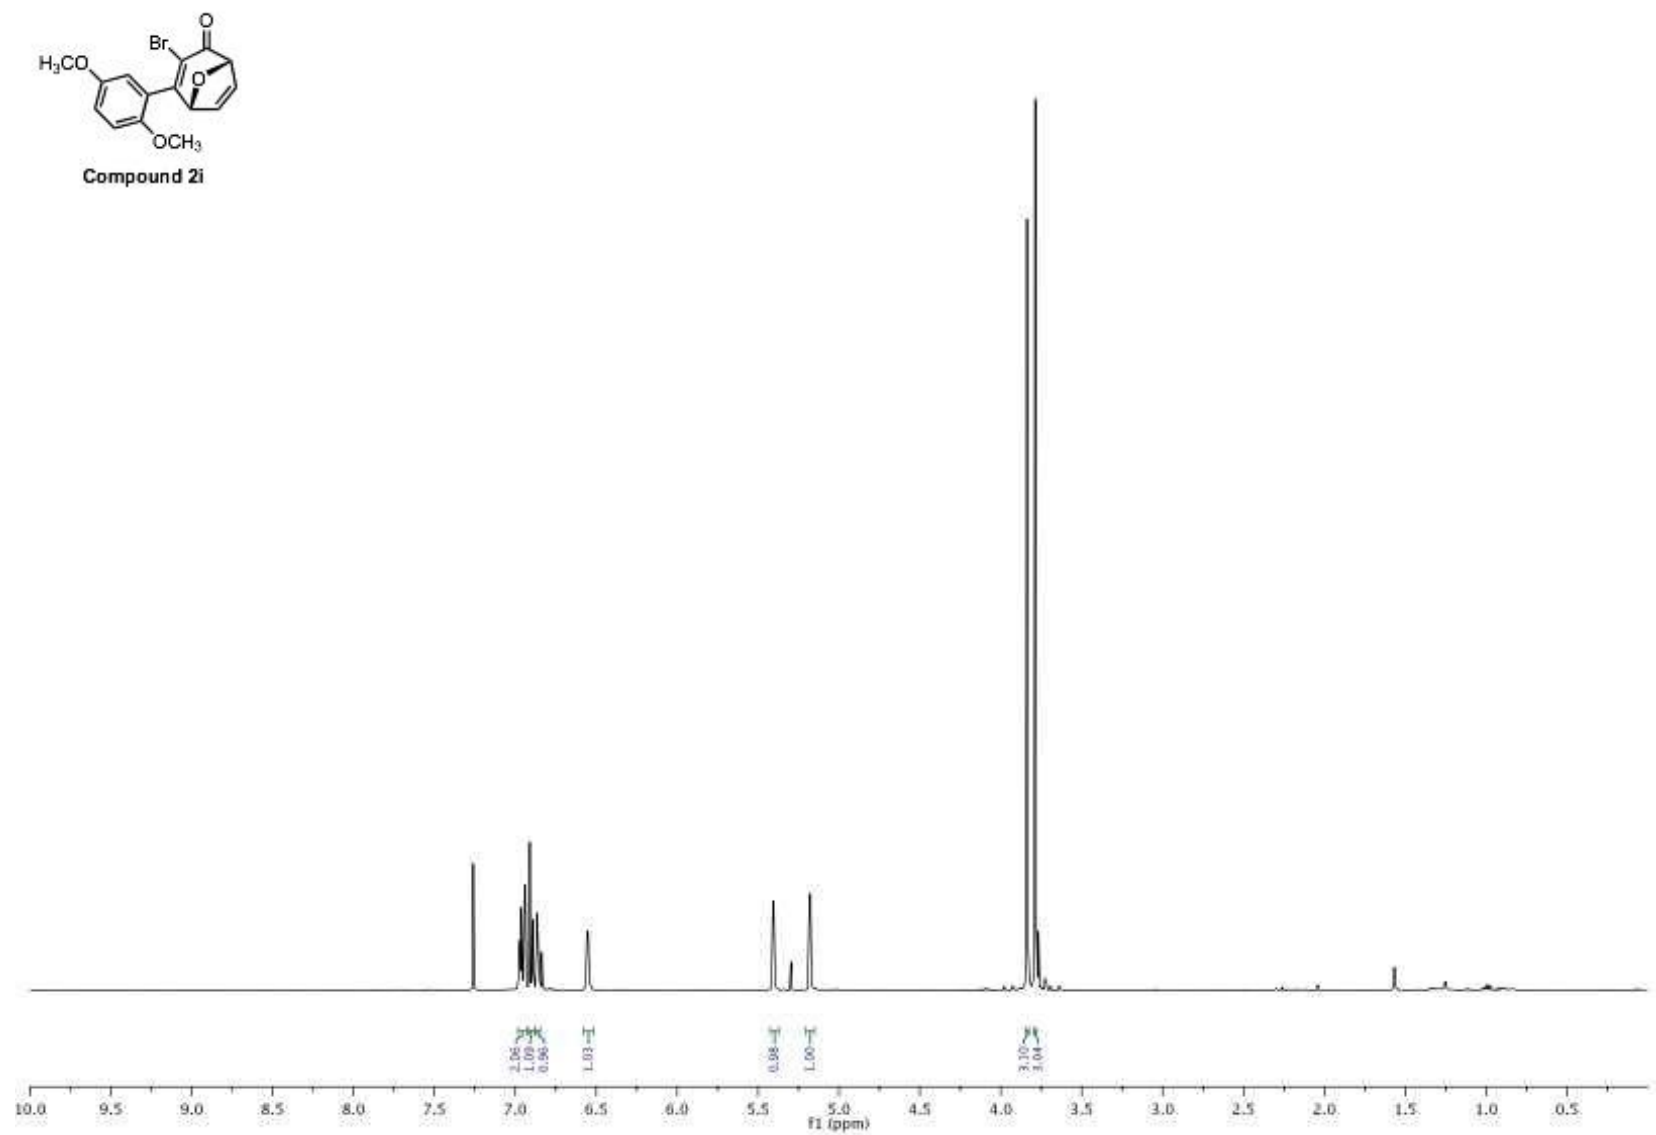

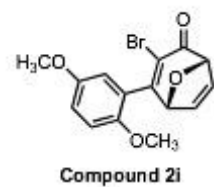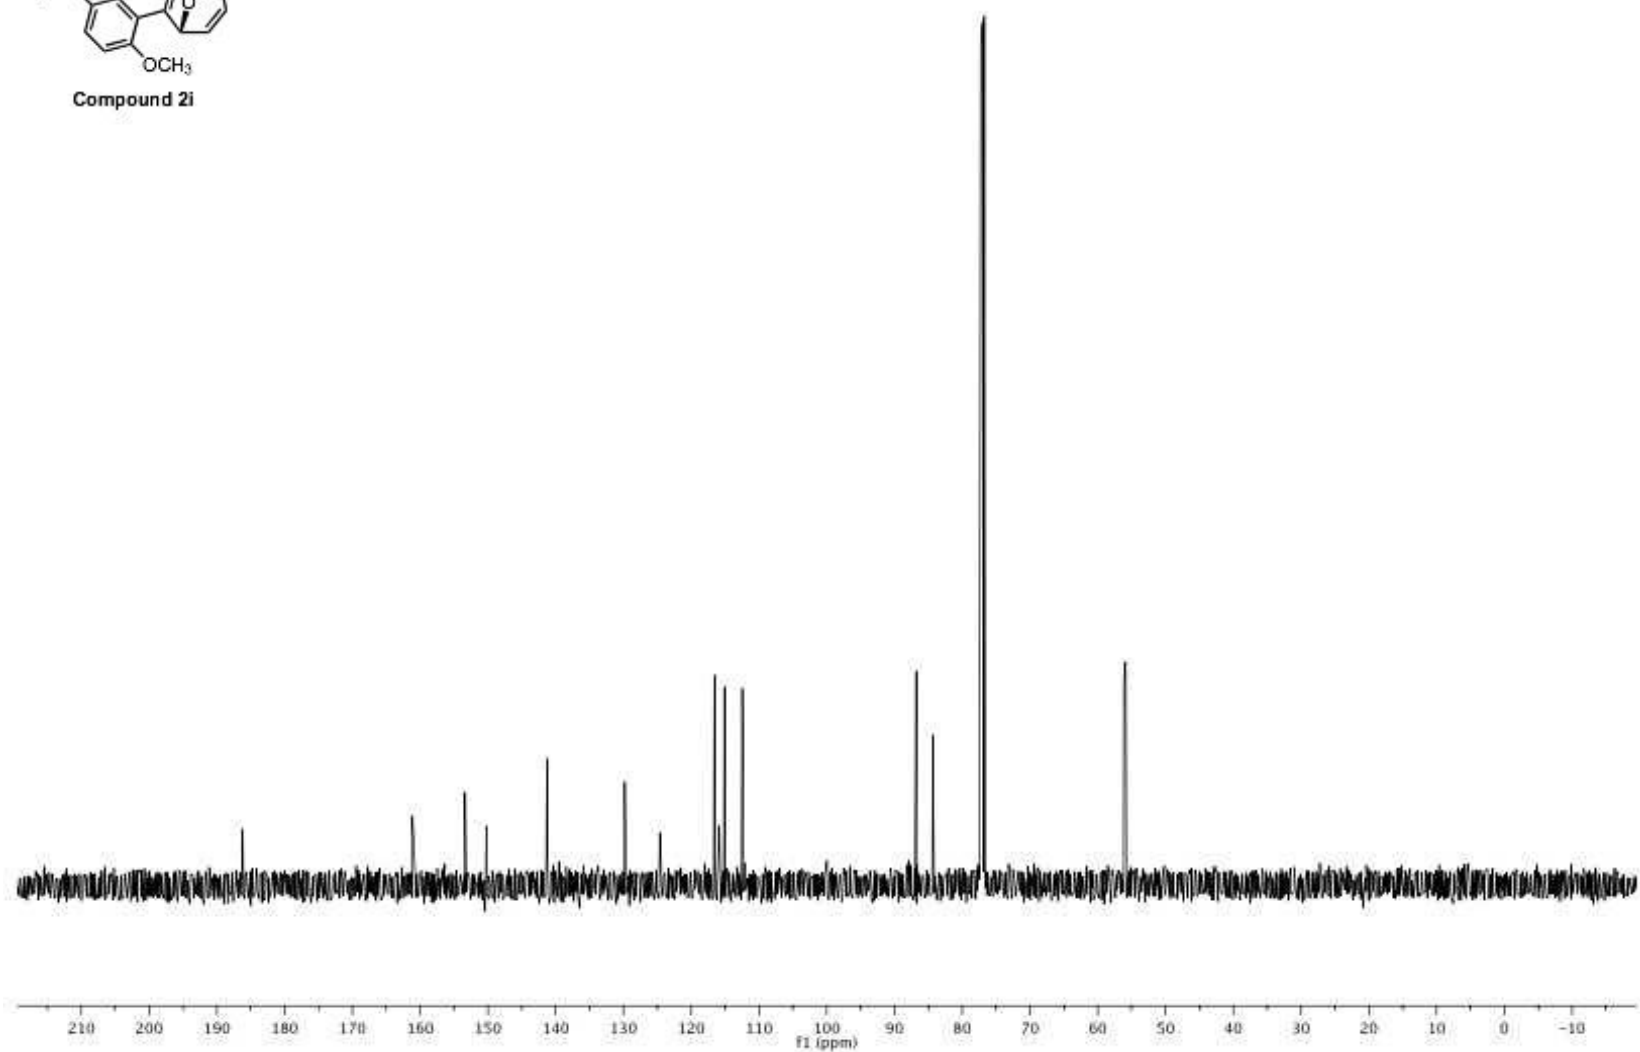

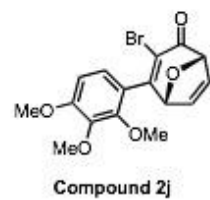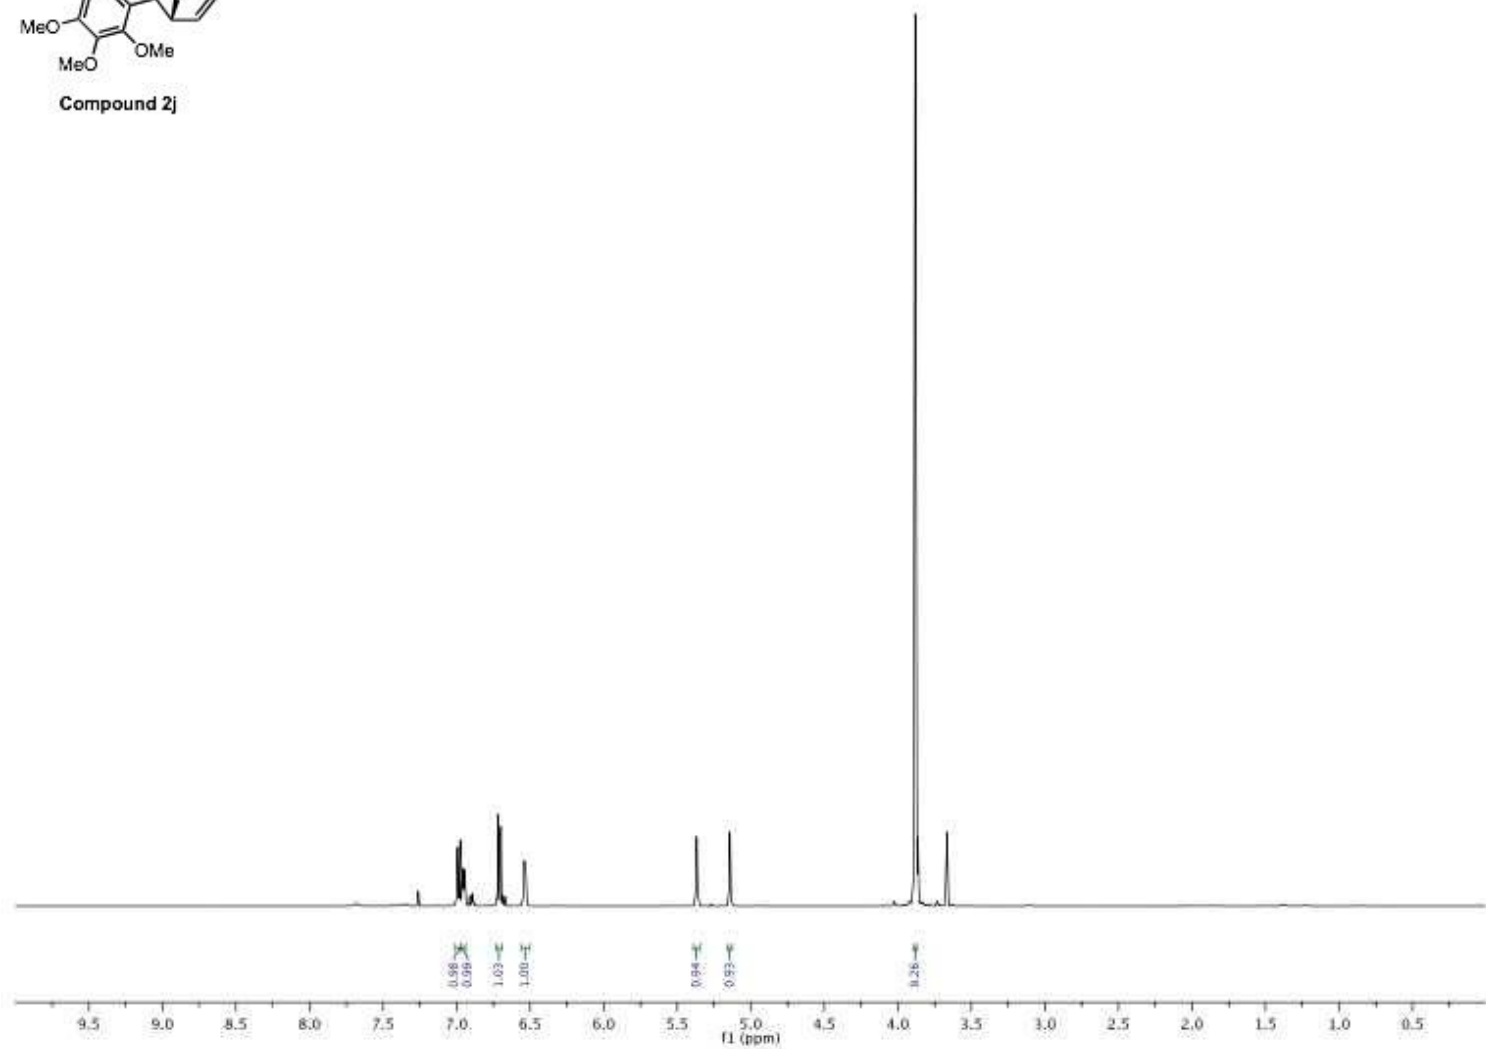

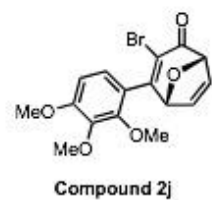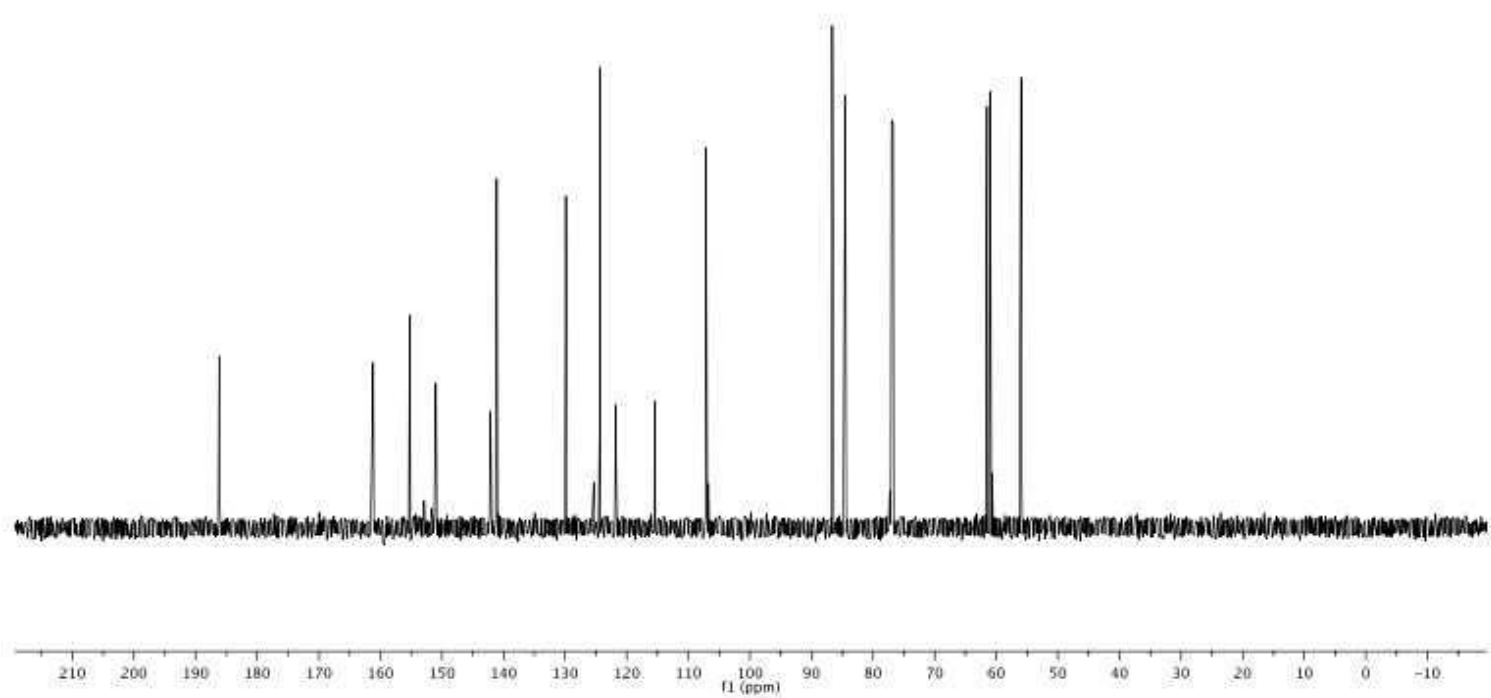

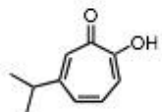

**$\beta$ -thjaplicin (6a)**

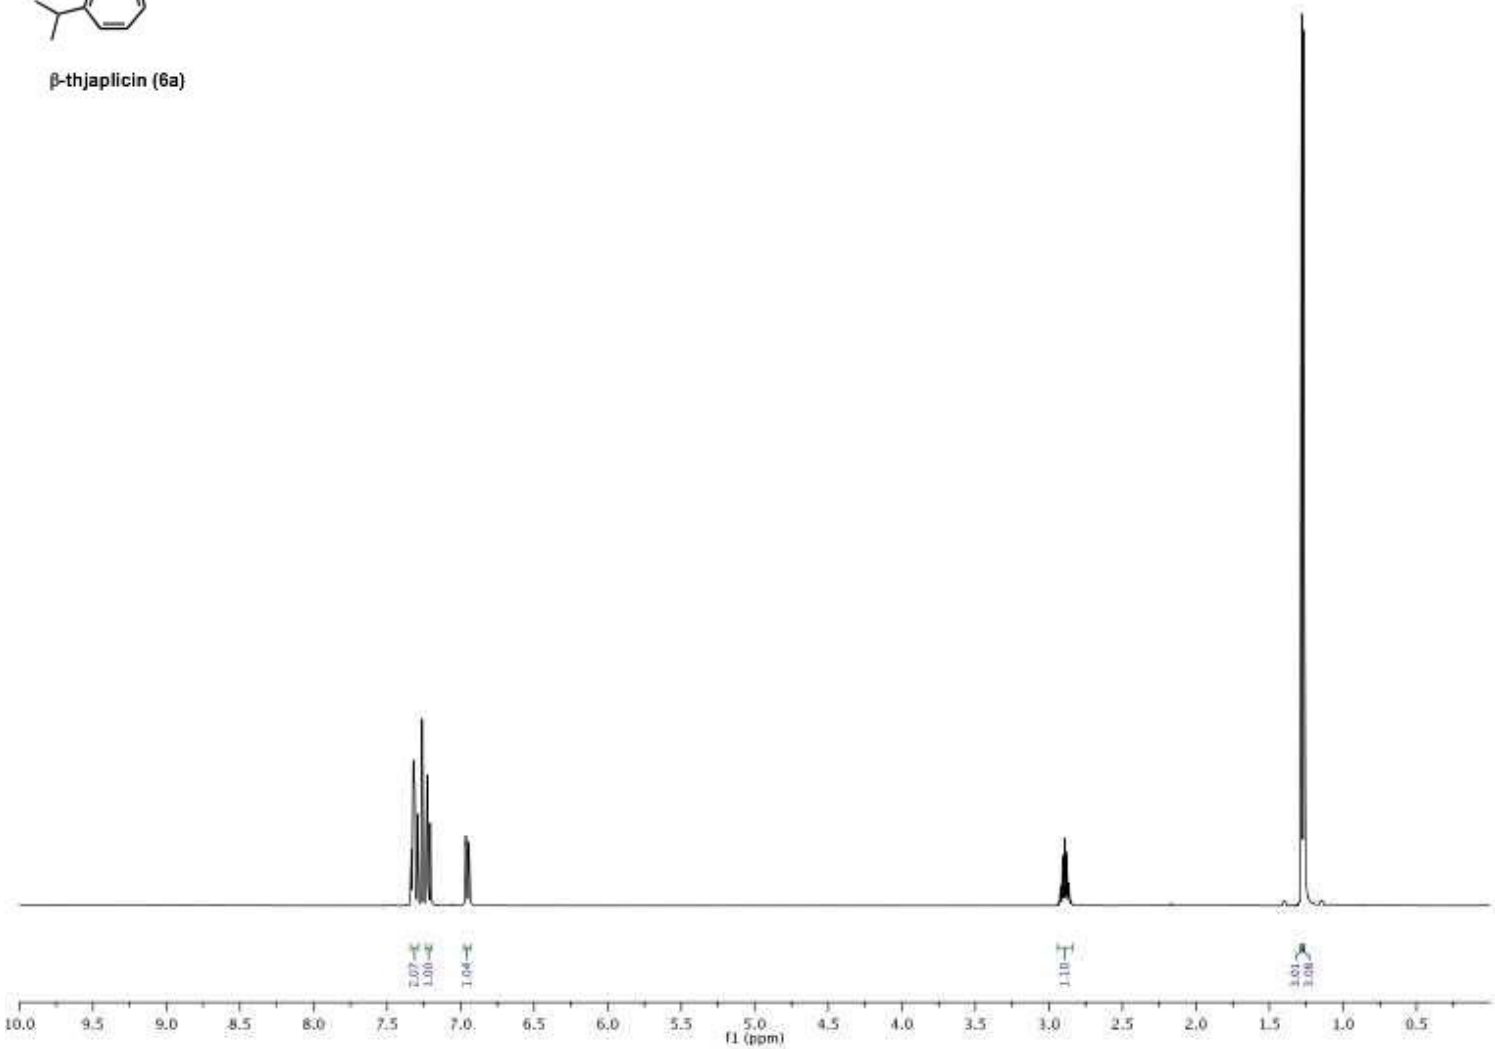



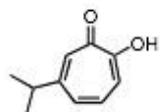

$\beta$ -thjaplicin (6a)

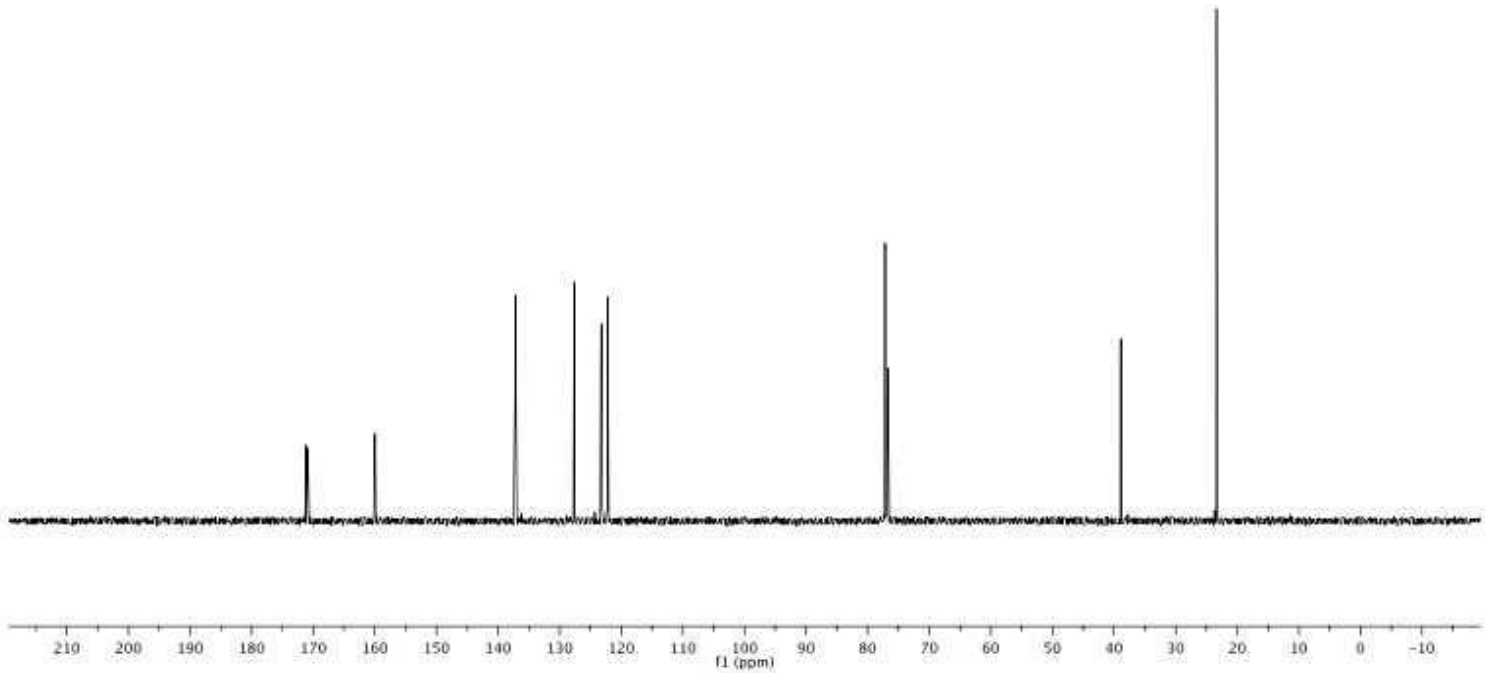

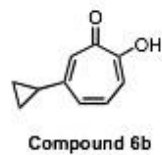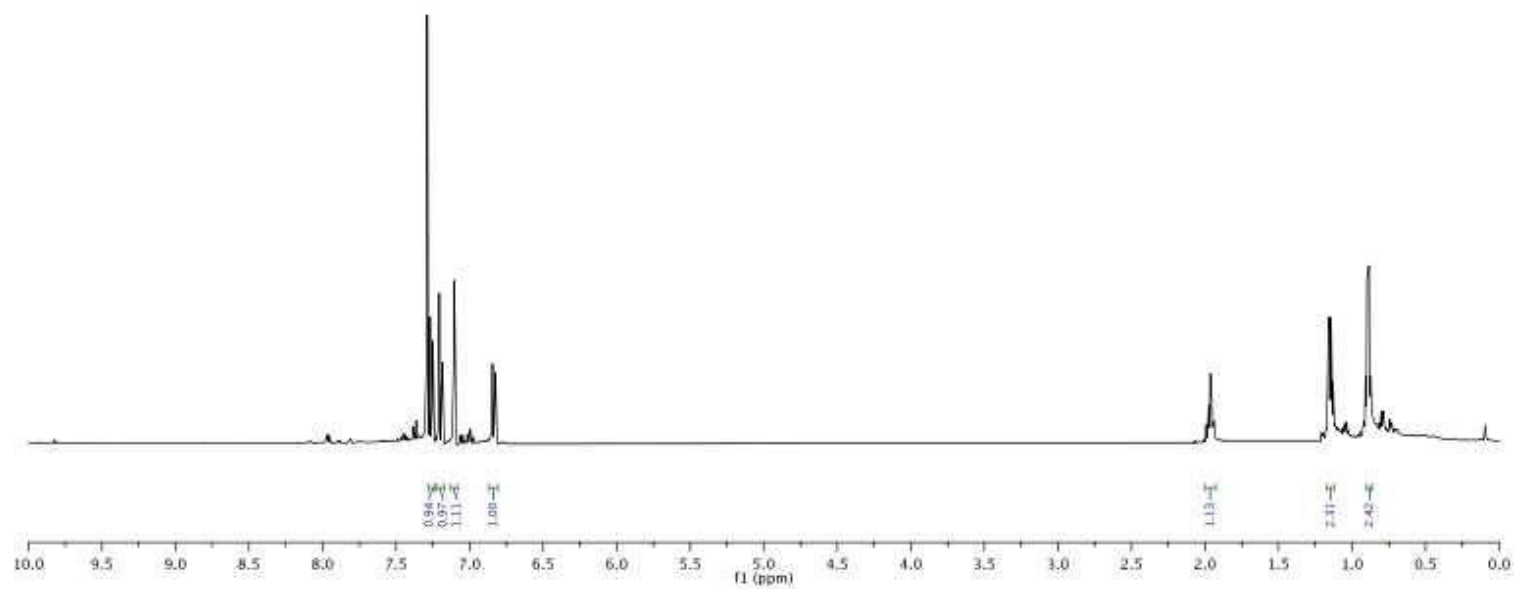

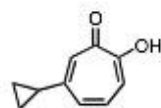

Compound 6b

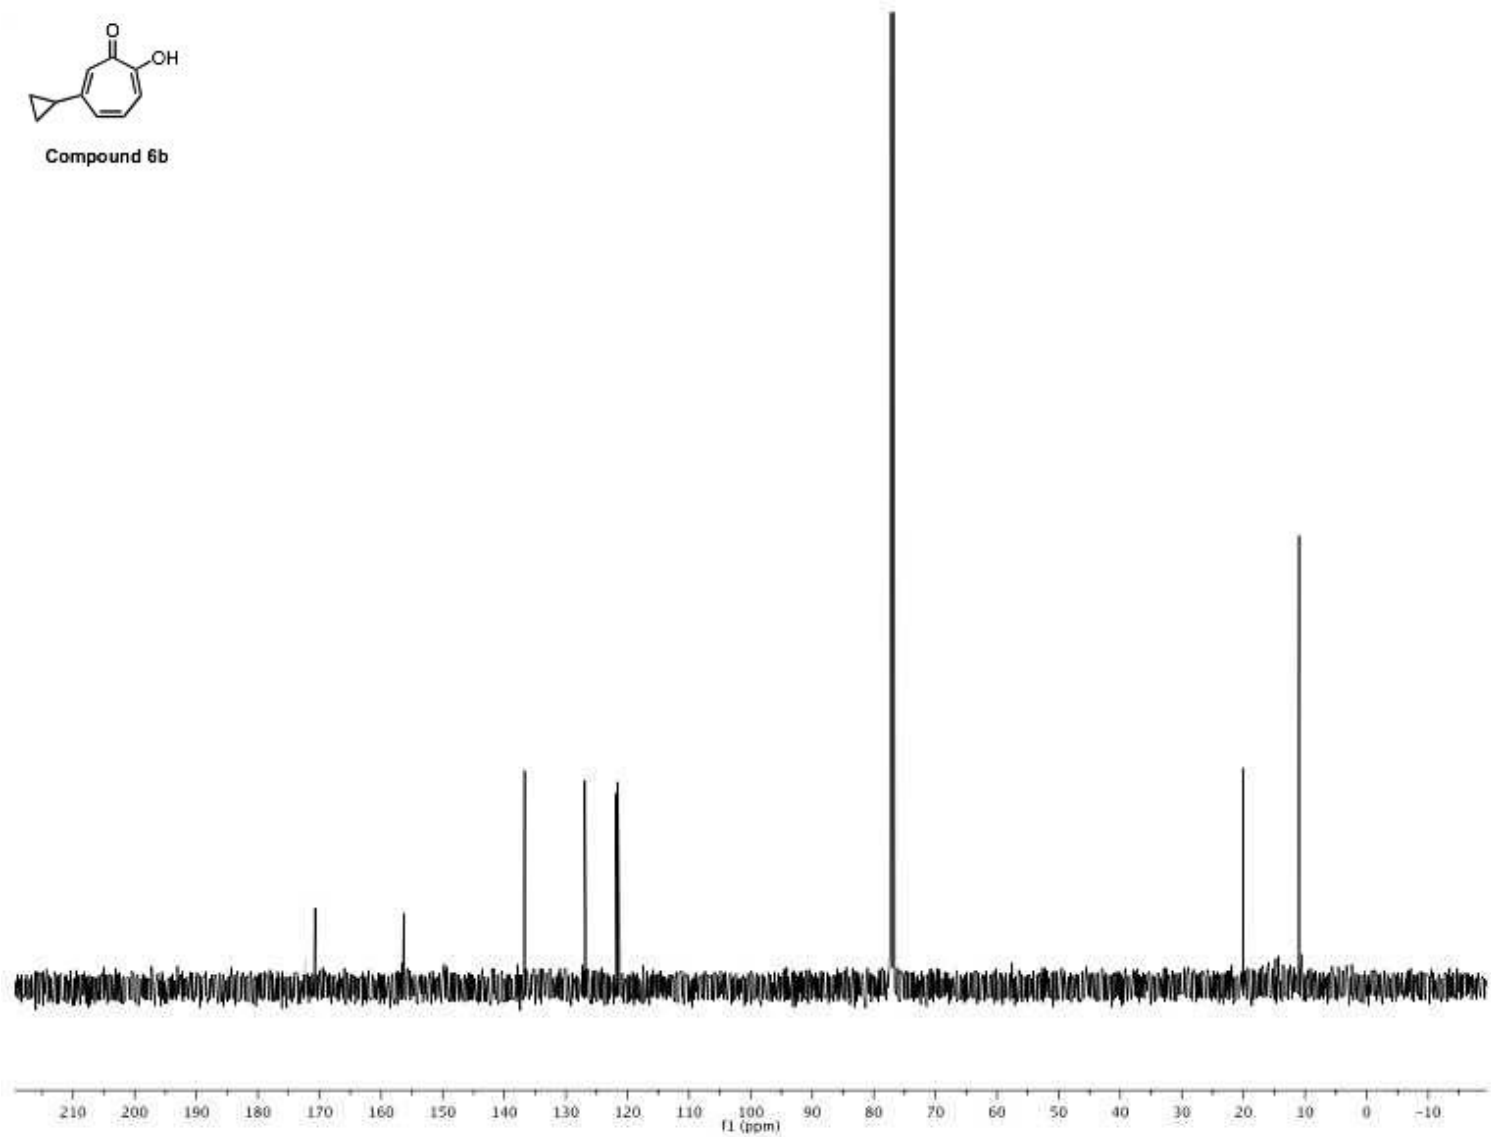

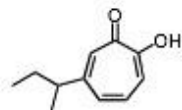

Compound 6c

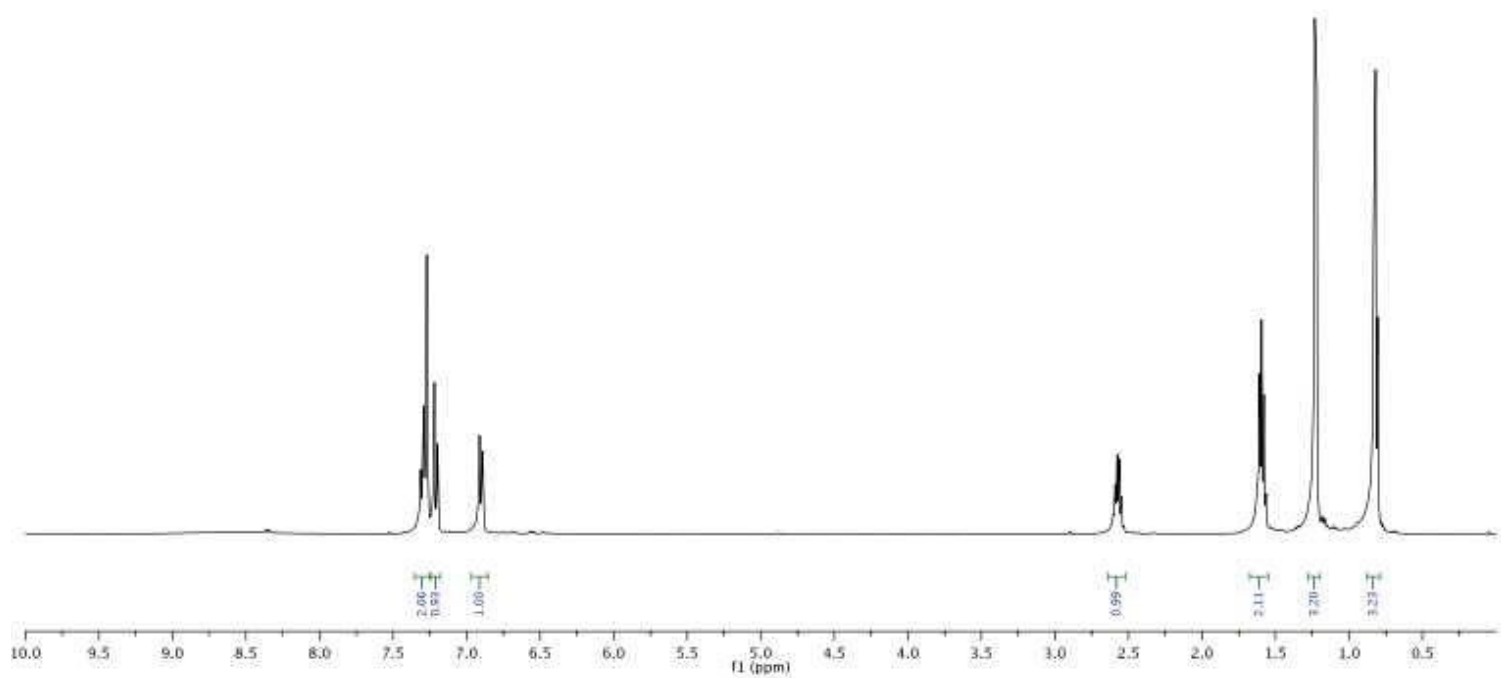

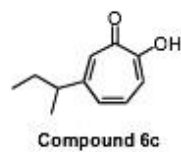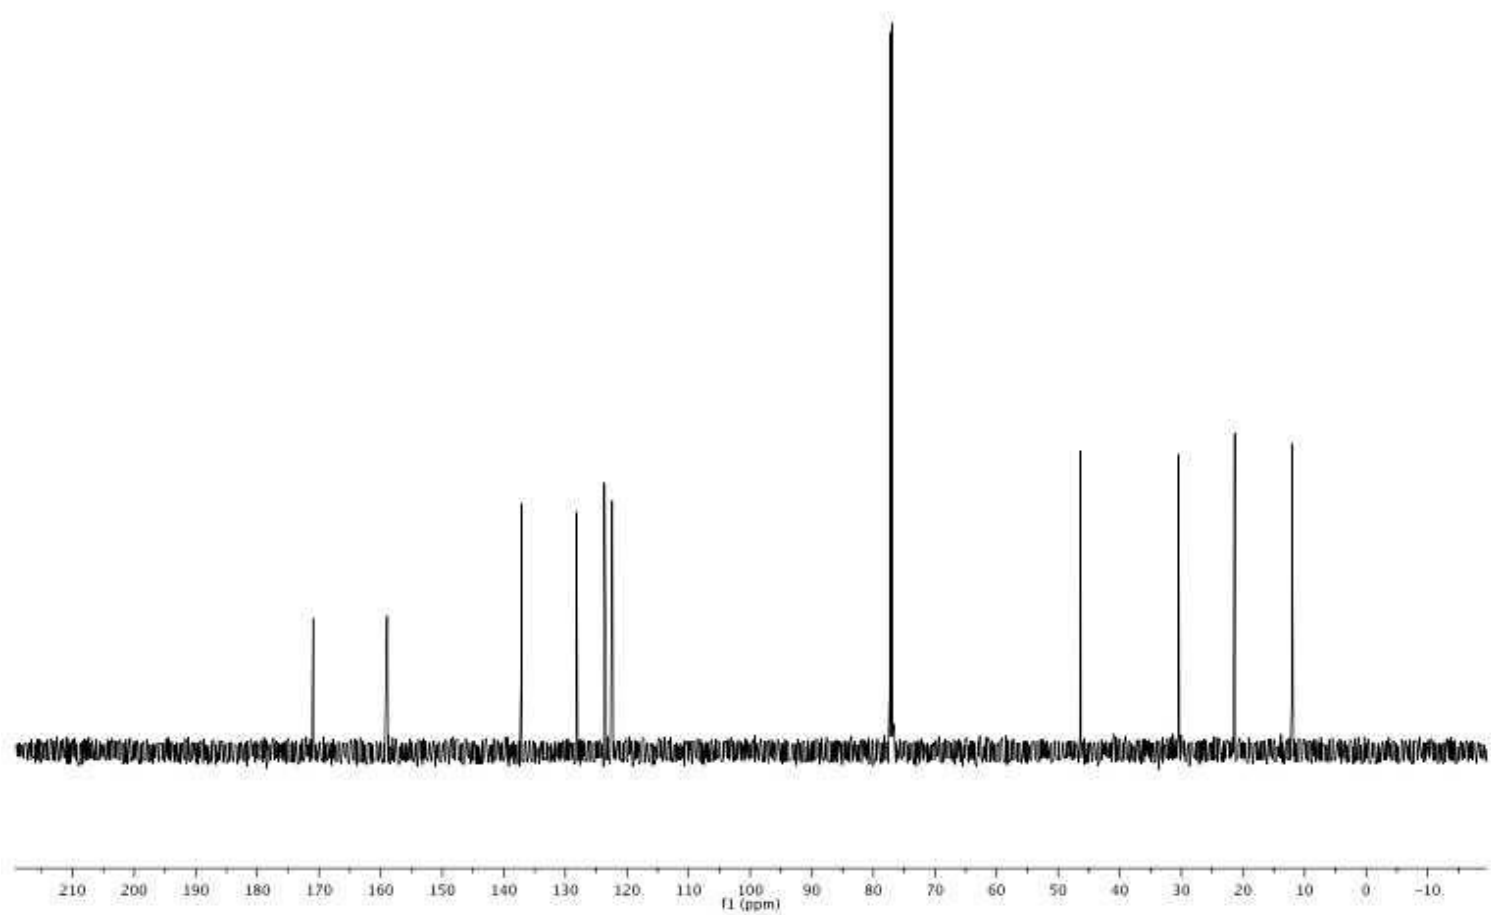

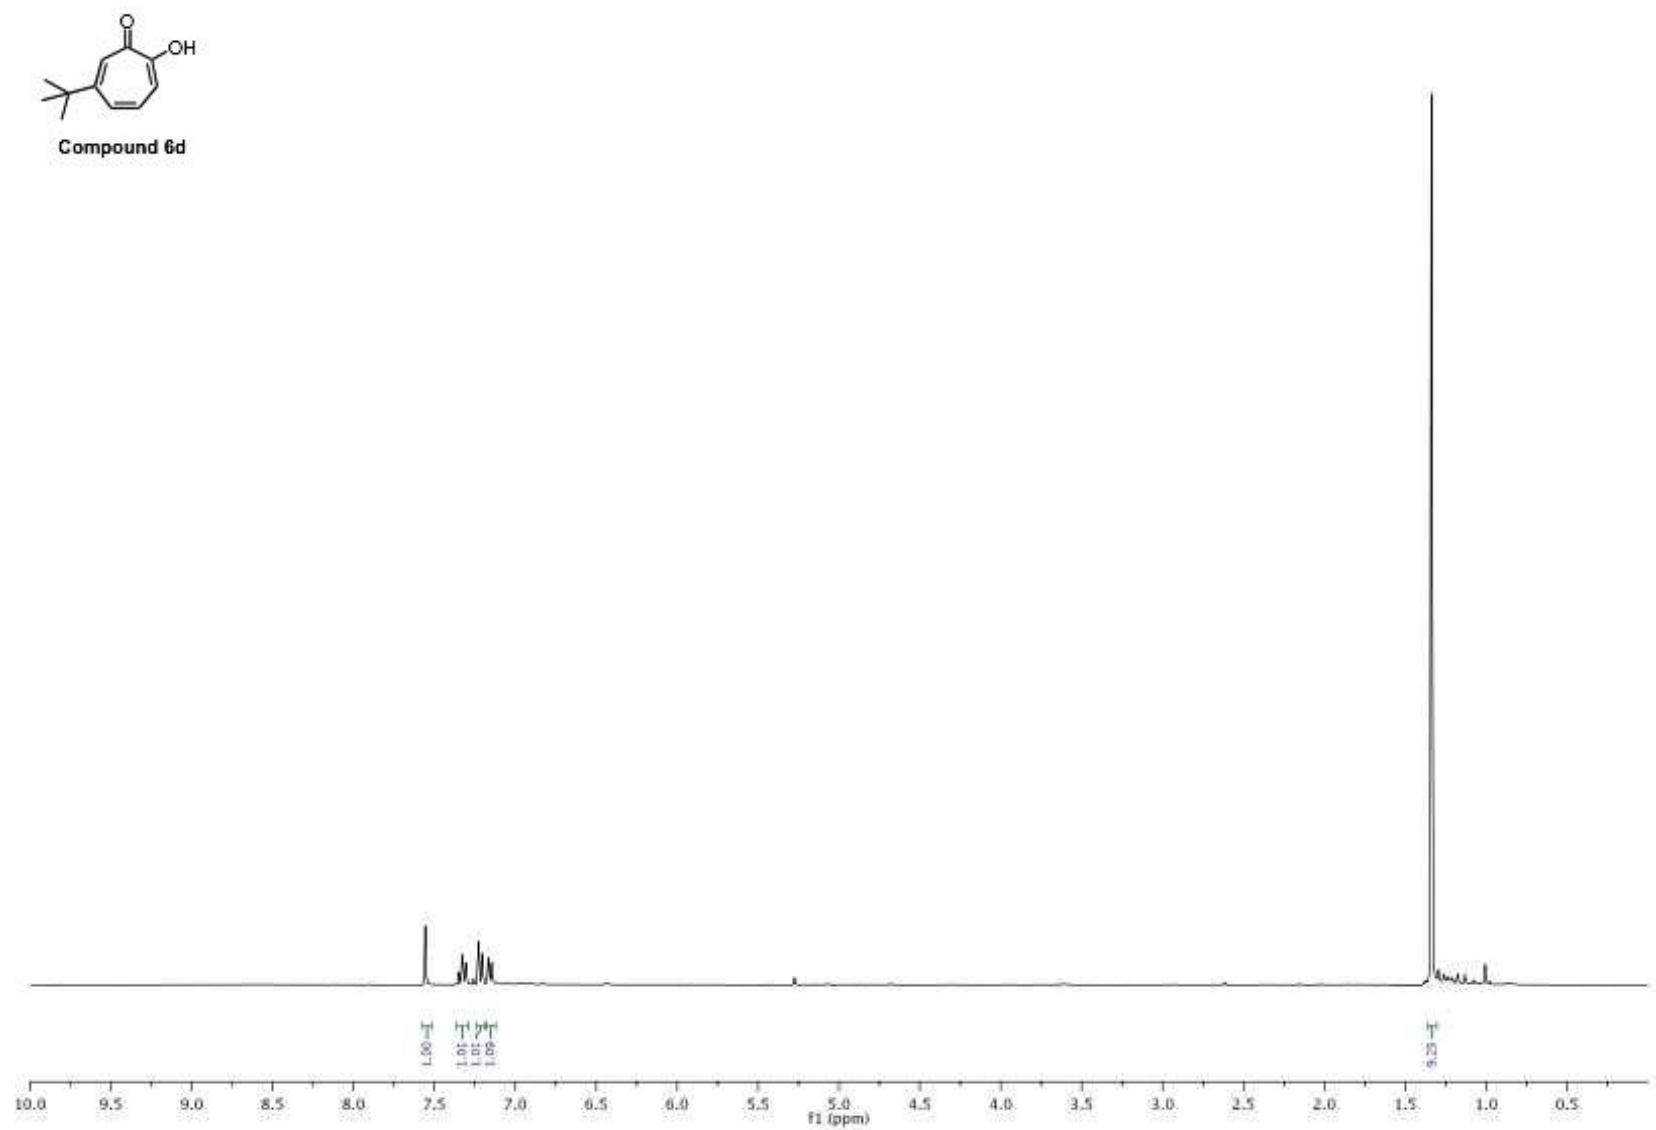

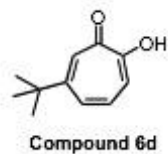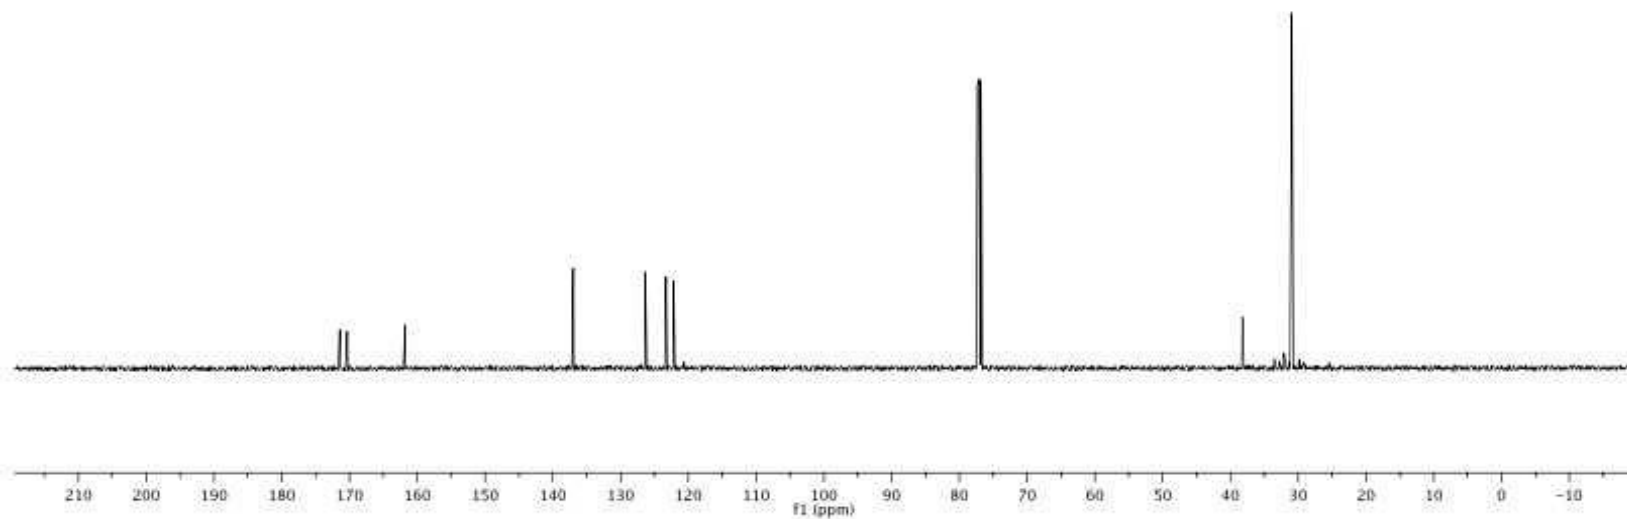

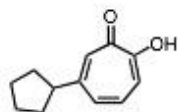

Compound 6e

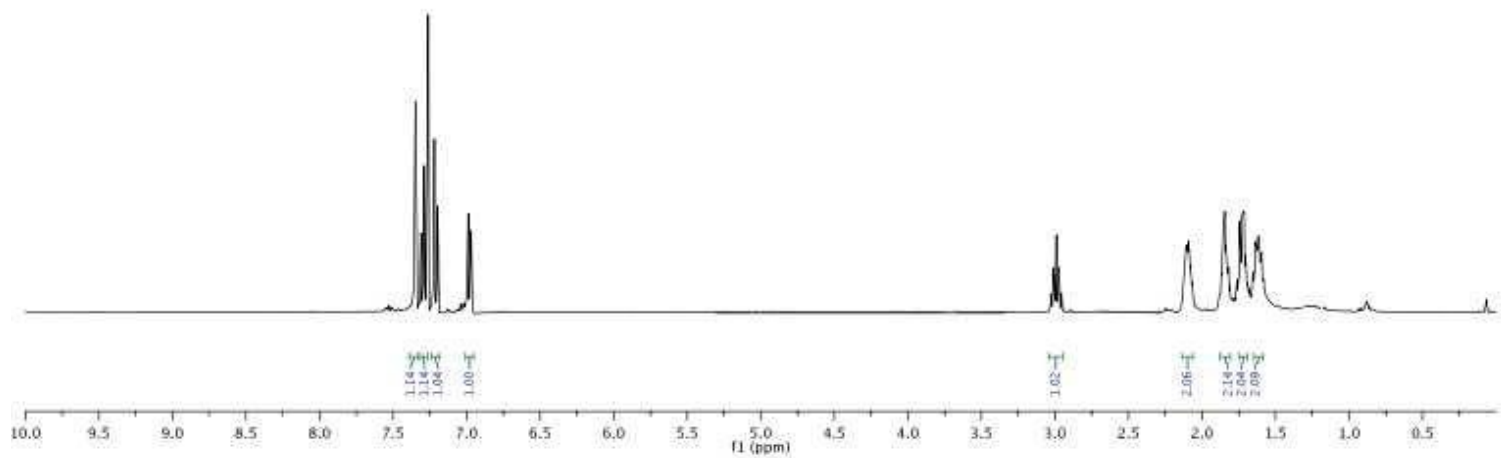



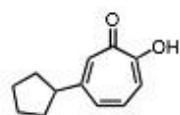

Compound 6e

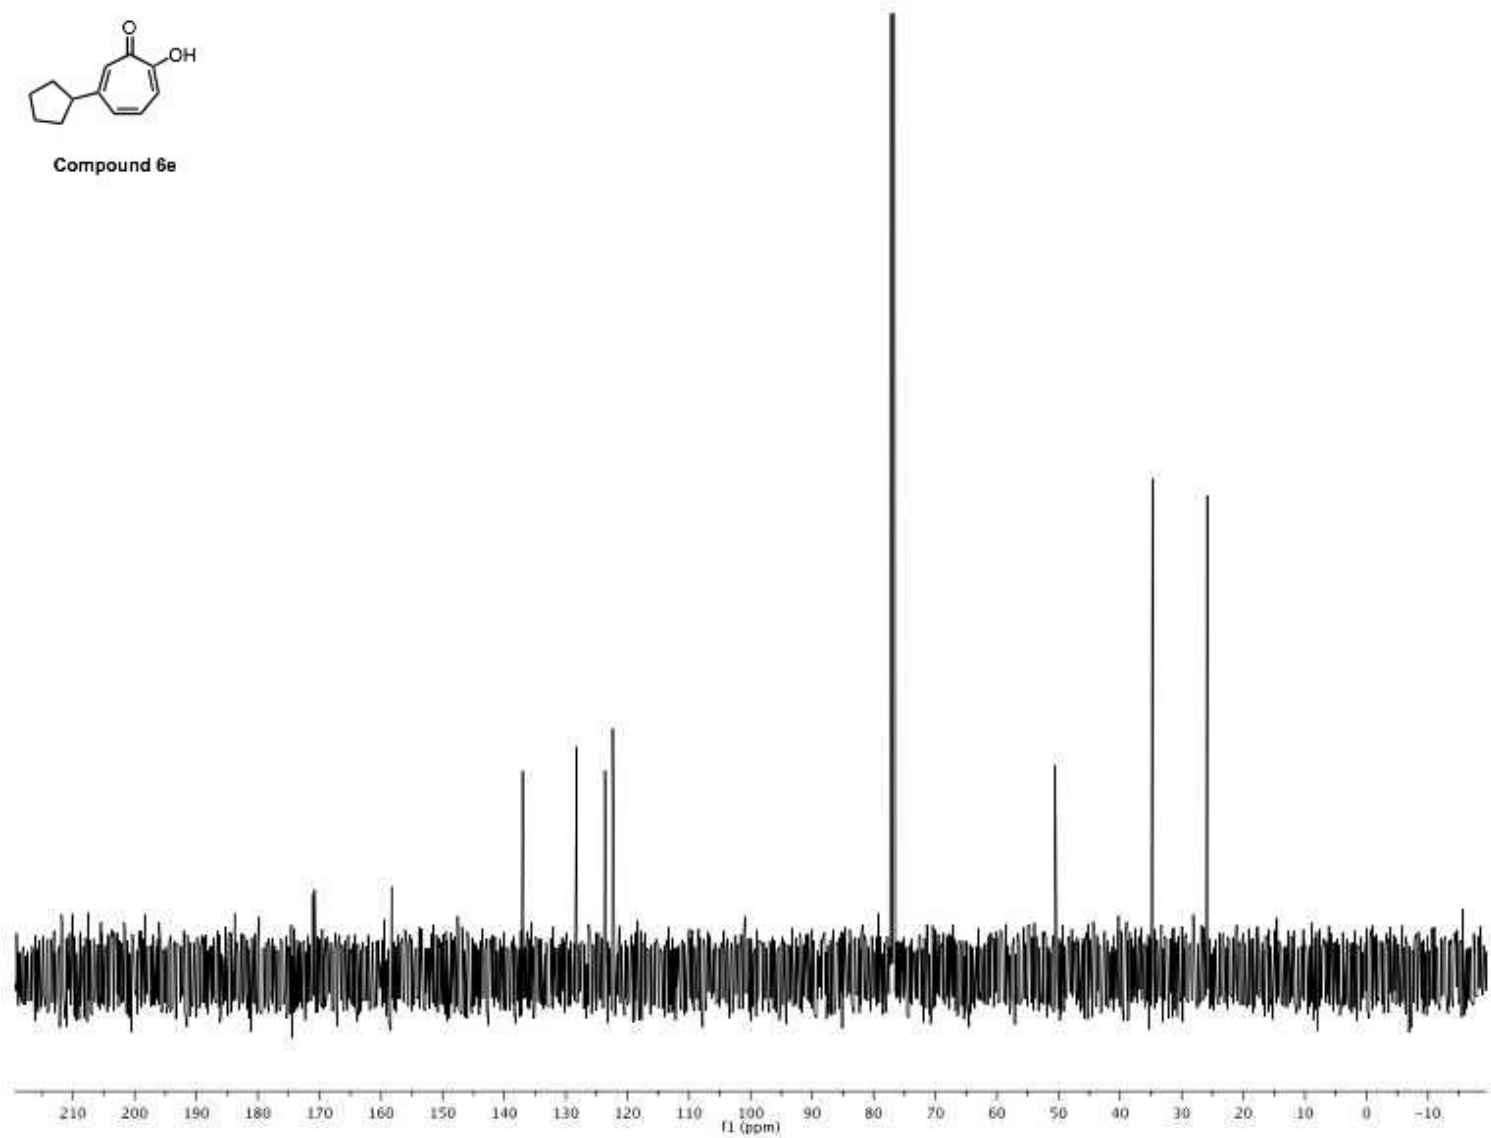

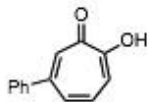

Compound 6f

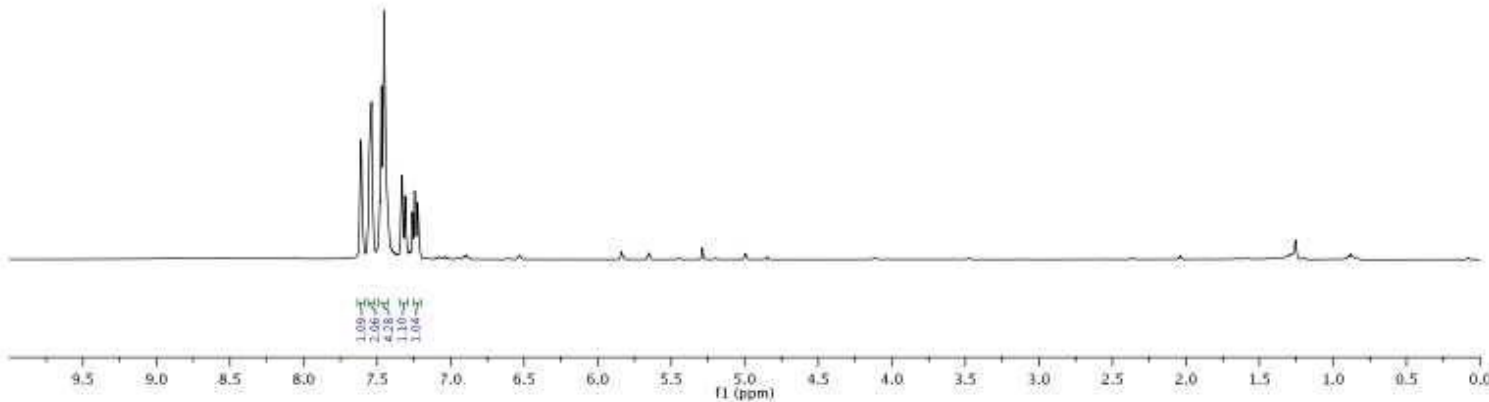

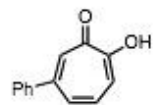

Compound 6f

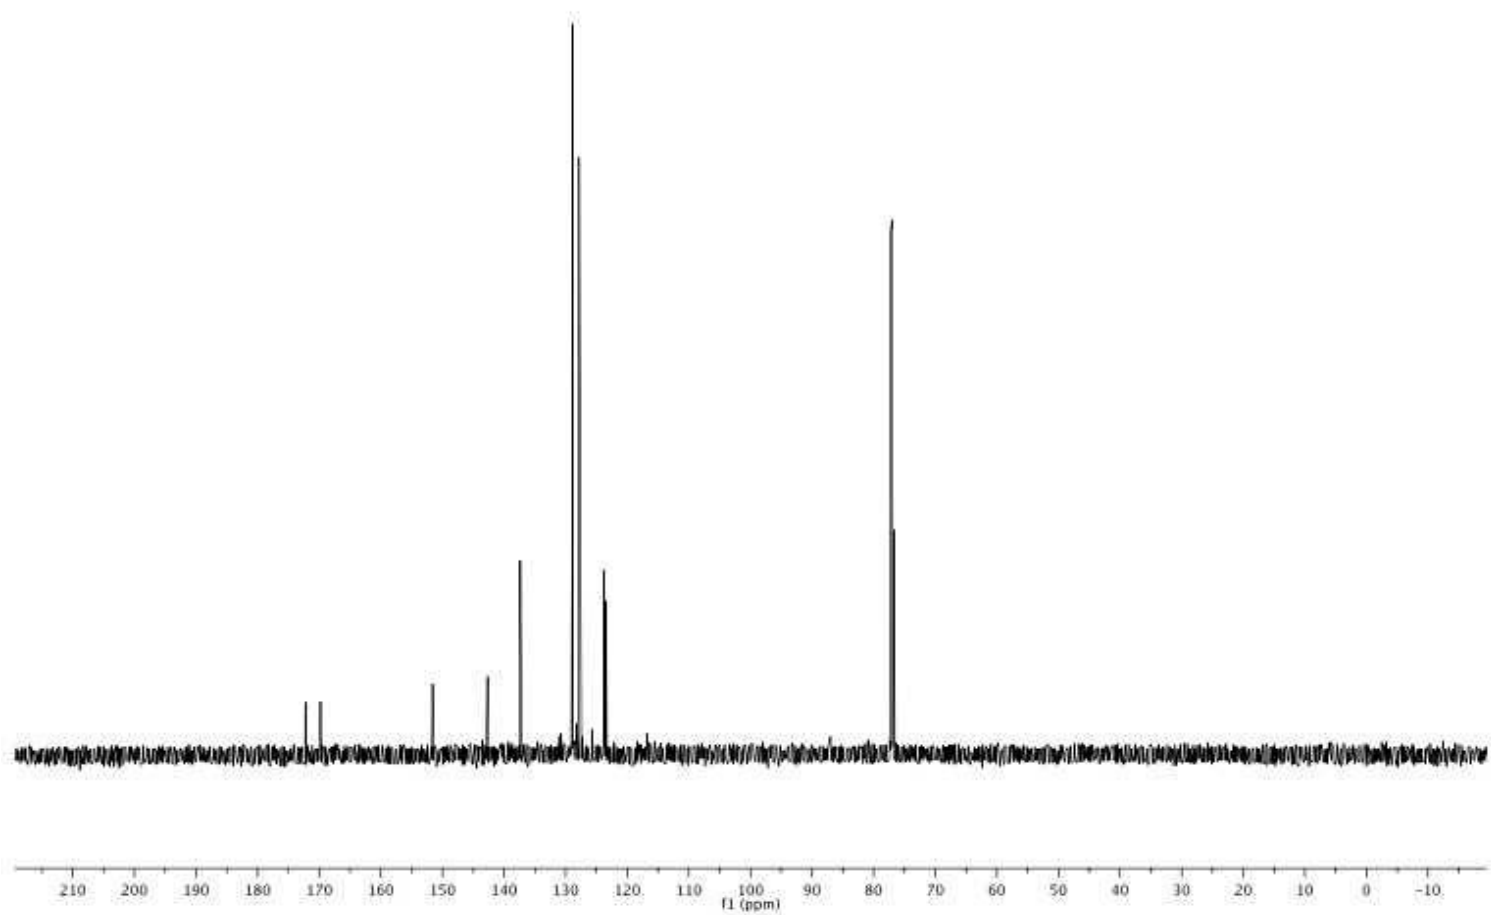

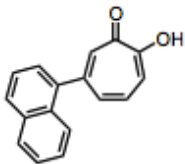

Compound 6g

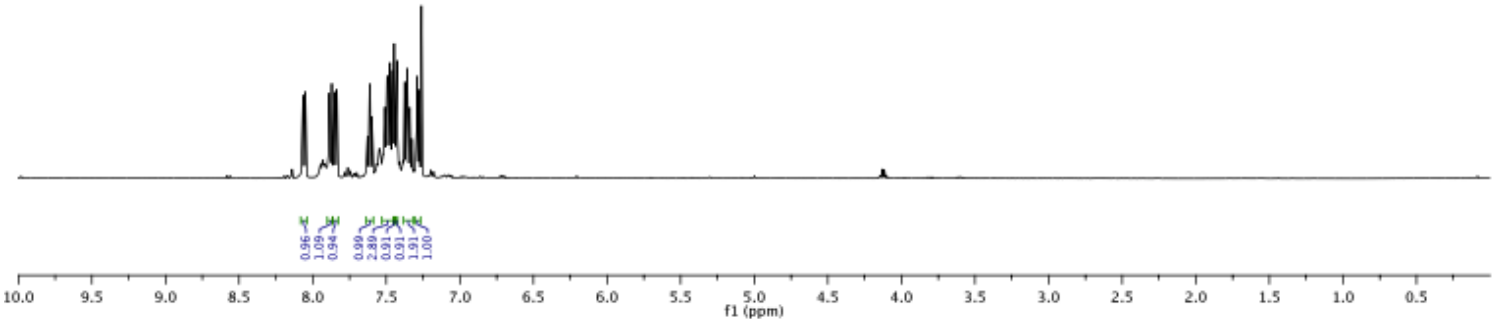

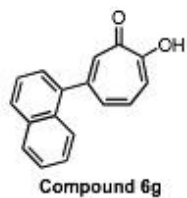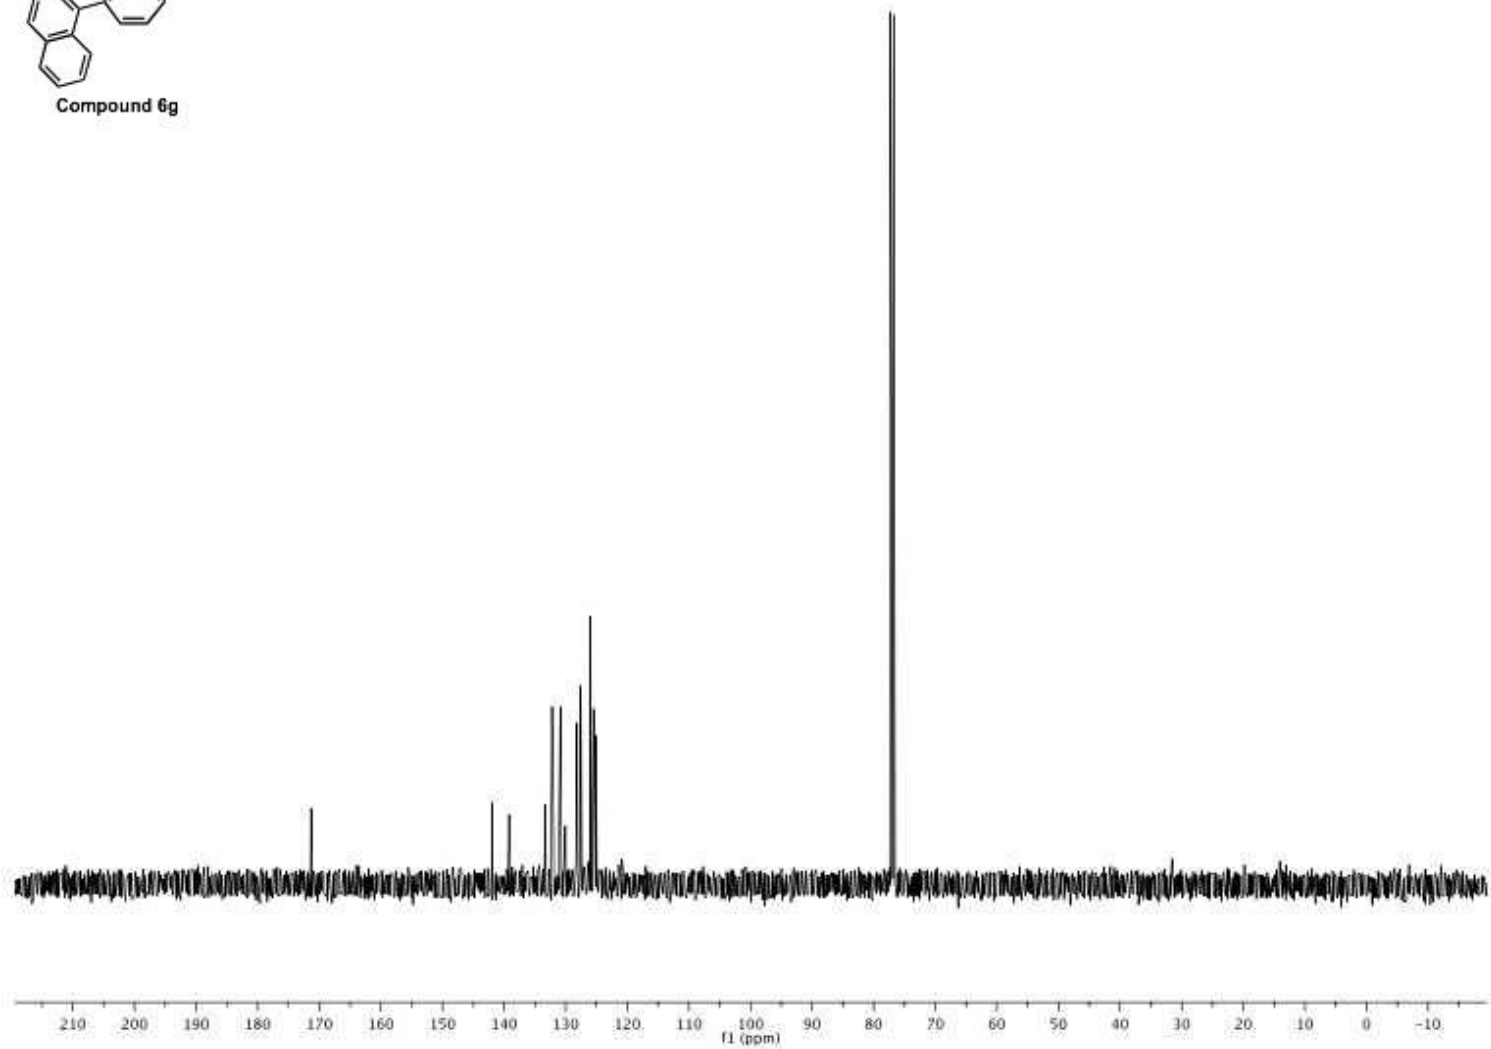

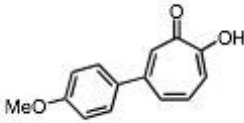

Compound 6h

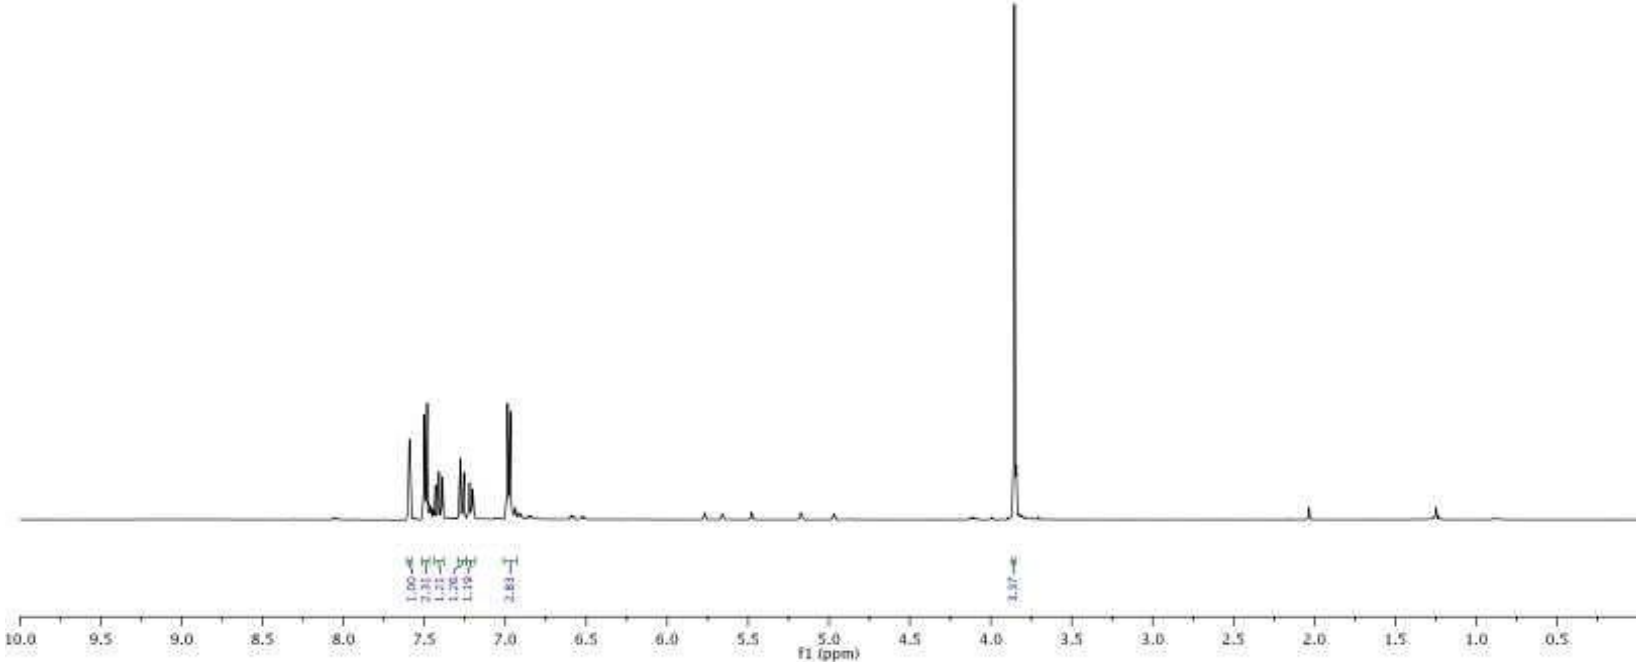

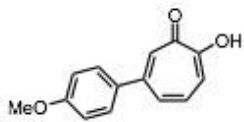

Compound 6h

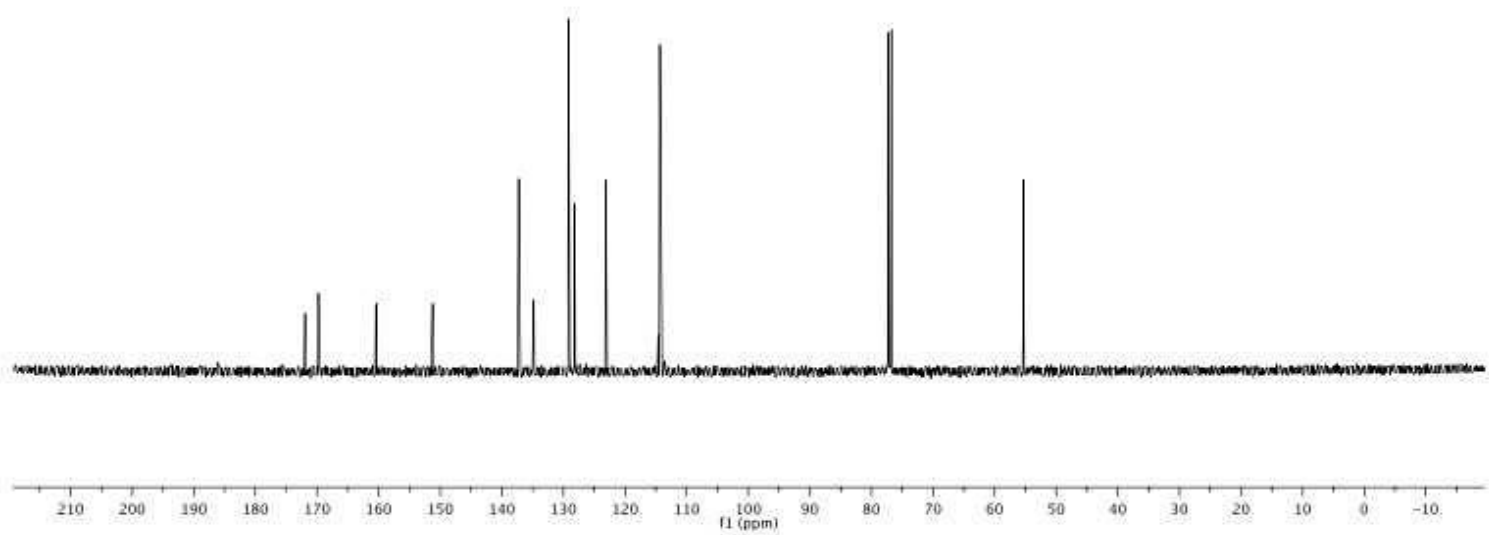

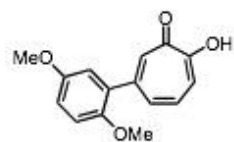

Compound 6i

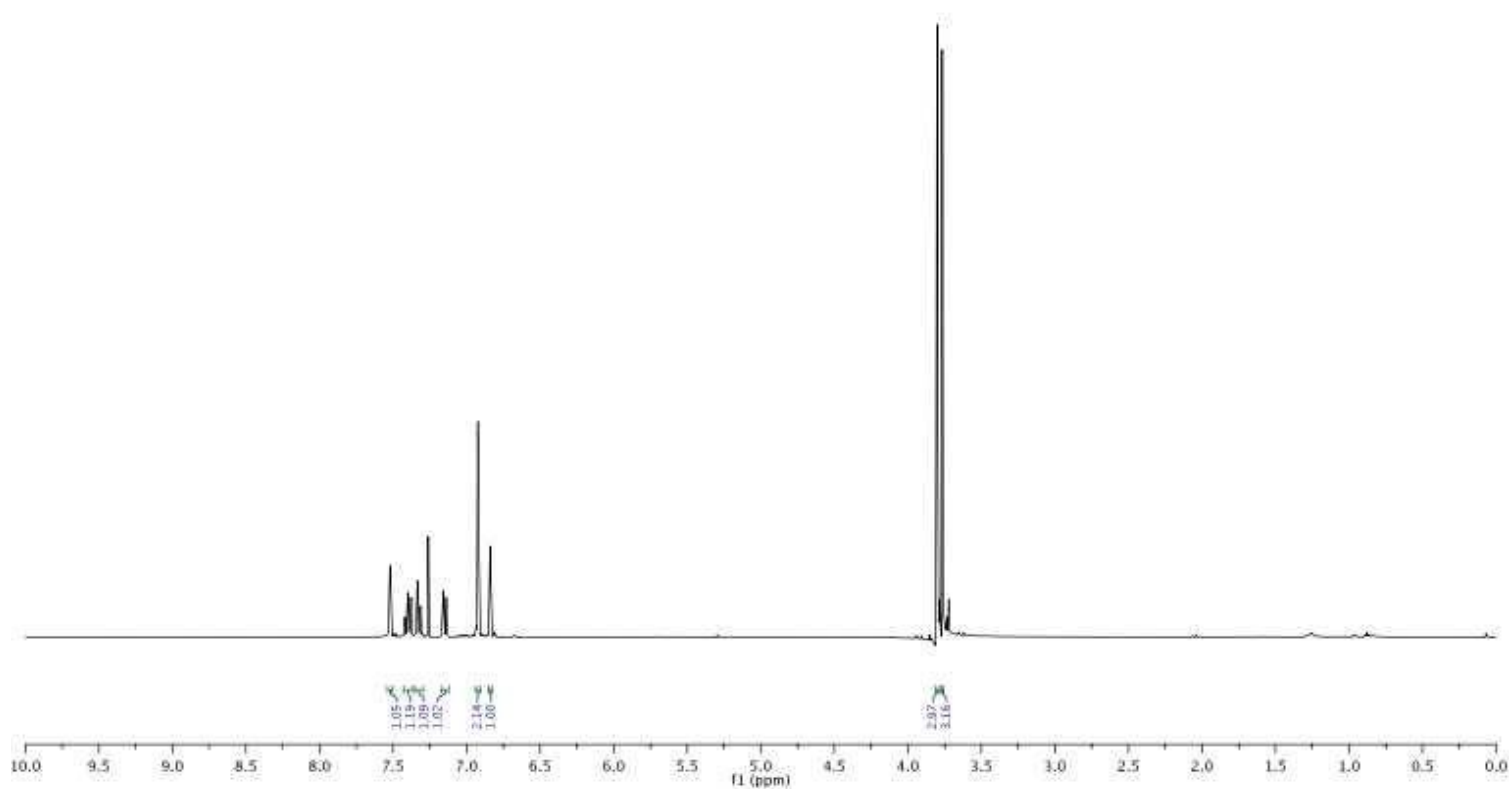



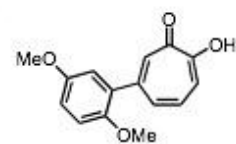

Compound 6i

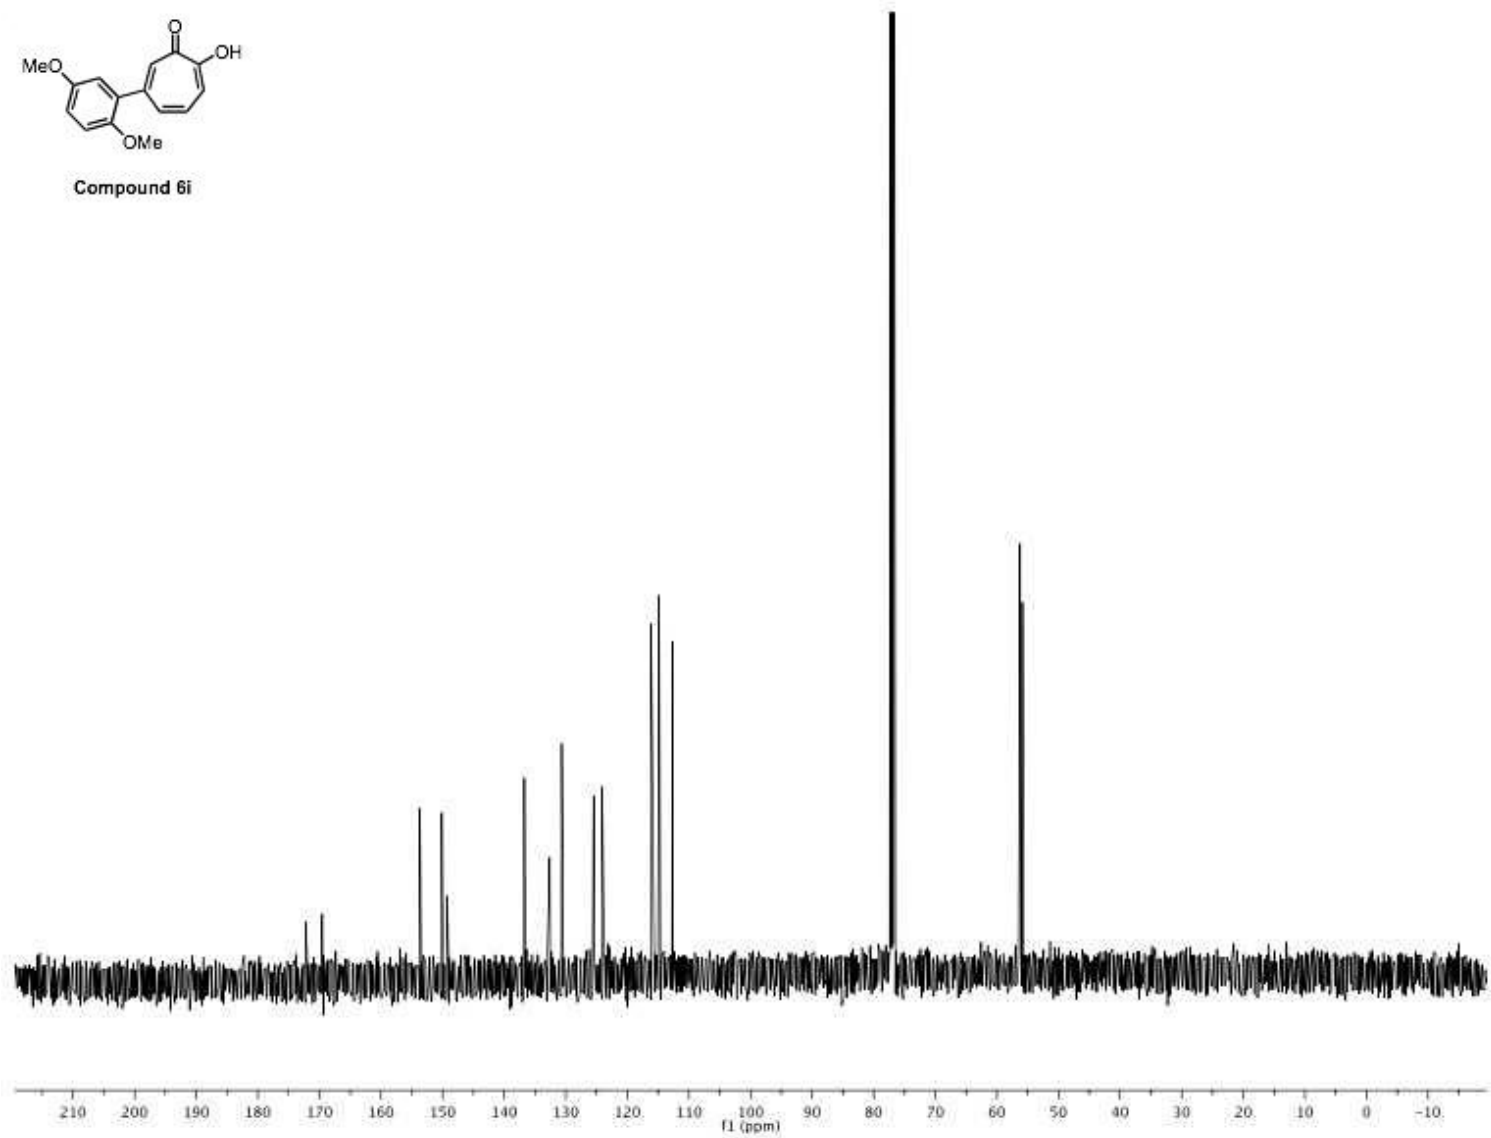

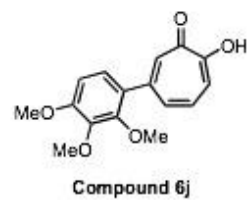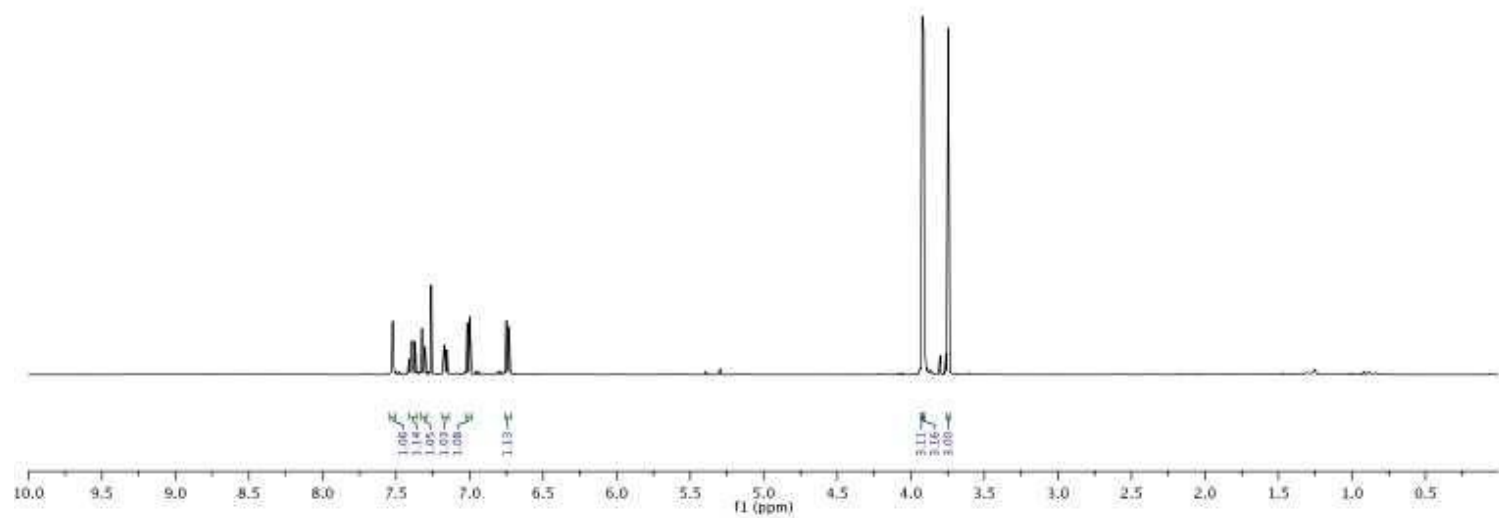

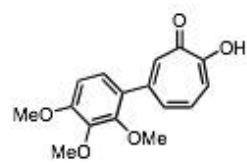

Compound 6j

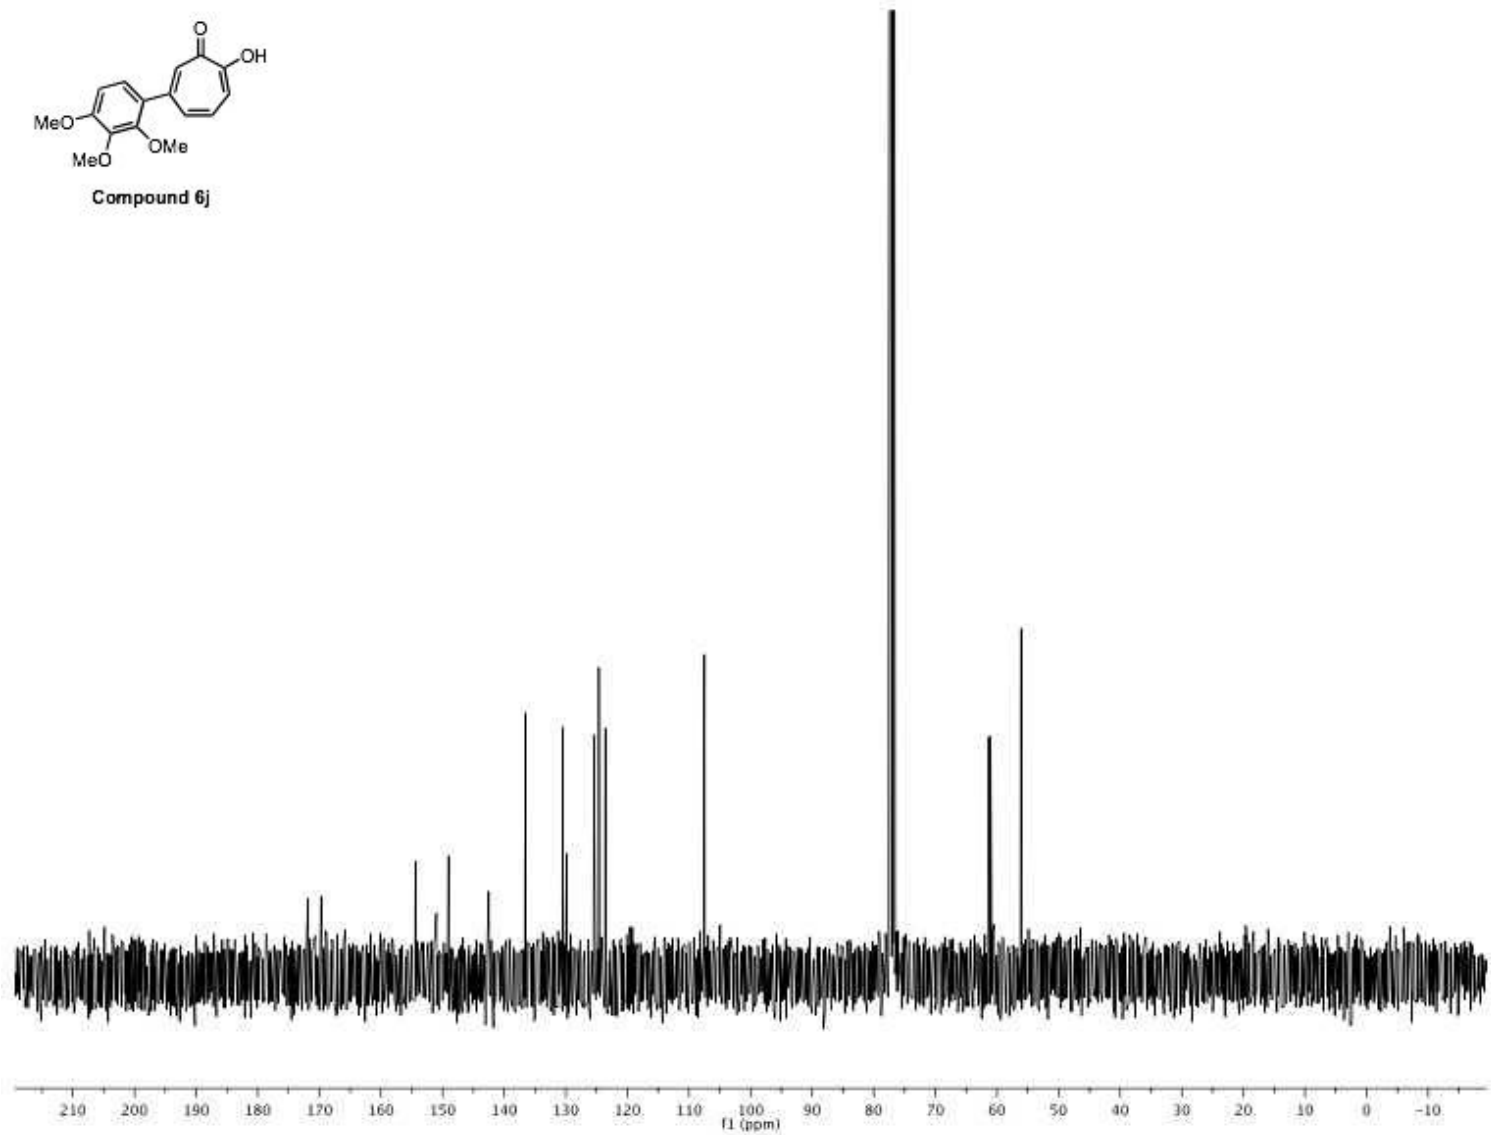

Supplement: c2ob26553b.pdf [file c2ob26553b.pdf]
